# Supplementary material for: Porous zeolitic imidazolate frameworks assembled with highly-flattened tetrahedral copper(ii) centres and 2-nitroimidazolates
Source: Royal Society of Chemistry journal article supplement (doi:10.1039/d2cc06797h), 2023-01-01
Supplement: d2cc06797h1.pdf [file d2cc06797h1.pdf]

## Electronic Supporting Information

Porous zeolitic imidazolate frameworks assembled with highly-flattened tetrahedral copper(II) centres and 2-nitroimidazoles

Cheolwon Jung, <sup>a</sup> Sang Beom Choi, <sup>b</sup> Jaewoo Park, <sup>c</sup> Minji Jung, <sup>c</sup> Jonghoon Kim, <sup>b</sup> Hyunchul Oh<sup>\*c,d</sup> and Jaheon Kim<sup>\*a</sup>

<sup>a</sup> Department of Chemistry, Soongsil University, Seoul 06978, Republic of Korea.

<sup>b</sup> Integrative Institute of Basic Science, Soongsil University, Seoul 06978, Republic of Korea

<sup>c</sup> Department of Chemistry, Ulsan National Institute of Science and Technology, Ulsan 44919, Republic of Korea

<sup>d</sup> Graduate School of Carbon Neutrality

<sup>e</sup> Ulsan National Institute of Science and Technology, Ulsan 44919, Republic of Korea

## Contents

|                                                                                                   |    |
|---------------------------------------------------------------------------------------------------|----|
| Section 1. General Methods .....                                                                  | 2  |
| Section 2. Syntheses and Characterizations .....                                                  | 3  |
| Section 3. Chemical Stability Tests in Aqueous Solutions at pH = 2 – 12 .....                     | 10 |
| Section 4. Crystal Structure Analyses .....                                                       | 12 |
| Section 5. H <sub>2</sub> Adsorption Measurements for Cu-ZIF- <b>gis</b> at Low Temperature ..... | 24 |
| Section 6. Calculations of the Q <sub>st</sub> values for Cu-ZIF- <b>gis</b> .....                | 26 |
| Section 7. N <sub>2</sub> adsorption isotherms for Cu-ZIF- <b>rho</b> .....                       | 27 |
| Section 8. Gas Adsorption Measurements for Cu-ZIF- <b>rho</b> .....                               | 29 |
| References .....                                                                                  | 37 |

## Section 1. General Methods

Copper(II) nitrate trihydrate ( $\text{Cu}(\text{NO}_3)_2 \cdot 3\text{H}_2\text{O}$ ), copper(I) chloride ( $\text{CuCl}$ ), and imidazole ( $\text{ImH}$ ) were purchased from Sigma-Aldrich. Imidazole-2-carboxaldehyde and 2-nitroimidazole were purchased from Tokyo Chemical Industry. *N,N*-dimethylformamide (DMF), 1-methyl-2-pyrrolidone (*N*-methylpyrrolidone, NMP), methanol, diethyl ether, nitric acid (60% solution in water), and sulfuric acid were purchased from Daejung Chemicals & Metals Co., Ltd. All chemicals were used without further purification.

Elemental analysis was performed with a Thermo Scientific Flash 2000 HT analyzer. Powder X-ray diffraction (PXRD) data were collected on a Rigaku MiniFlex diffractometer with  $\text{CuK}\alpha$  radiation ( $\lambda = 1.5418 \text{ \AA}$ ). Single crystal X-ray diffraction (SCXRD) data were collected with synchrotron radiation on a Rayonix MX225HS CCD area detector at the BL2D-SMC beamline at Pohang Accelerator Laboratory (PAL). Thermogravimetric analyses (TGA) were carried out using a PerkinElmer Pyris 1 in the air at a heating rate of  $5 \text{ }^\circ\text{C}/\text{min}$ . Fourier transform infrared (FT-IR) spectra were measured employing a PerkinElmer FT/IR using the samples prepared as KBr pellets.  $^1\text{H}$ -NMR spectra were recorded with a Bruker 400 MHz NMR spectrometer. Field emission-scanning electron microscope (FE-SEM) images were obtained using the Carl Zeiss GeminiSEM 300 at 10 kV.

The conventional low-pressure  $\text{N}_2$  adsorption-desorption isotherms were measured using the standard volumetric procedure on a BELSORP-mini (BEL-Japan, INC.) equipment. Typically,  $\sim 100 \text{ mg}$  of a dried Cu-ZIF sample on a Schlenk line was loaded in a sample tube, and heated at  $160 \text{ }^\circ\text{C}$  for 12 hours in vacuum ( $< 1.0 \times 10^{-3} \text{ Torr}$ ) before gas adsorption experiments. The dead volume of the sample tube was automatically measured with He gas. All used gases were ultrahigh purity grade (99.9999 %). Before measuring, each sample was dried and fully degassed at  $160 \text{ }^\circ\text{C}$  for 10 h (Cu-ZIF-**gis**) or  $120 \text{ }^\circ\text{C}$  for 6 h (Cu-ZIF-**rho**) under vacuum ( $< 1.0 \times 10^{-3} \text{ Torr}$ ). The dead volume of the sample cell was automatically measured using helium gas. Pressure equilibrium points were also collected automatically by the equipment for adjusted equilibrium time. The weight of each sample was measured after the measurement. The measurement temperature was maintained using a liquid nitrogen or argon bath or an ethylene glycol/water circulator.

The high-pressure gas ( $\text{H}_2$ ,  $\text{CO}_2$ , and  $\text{CH}_4$ ) sorption isotherms were measured using the standard volumetric procedure on a BELSORP-HP instrument (BEL-Japan, INC.). Typically,  $0.5\sim 1.0 \text{ g}$  of a dried Cu-ZIF sample on a Schlenk line was loaded in a sample tube, and heated at  $160 \text{ }^\circ\text{C}$  for 12 hours in vacuum ( $< 1.0 \times 10^{-3} \text{ Torr}$ ) before gas adsorption experiments. The dead volume of the sample tube was automatically measured with He gas. All used gases were ultrahigh purity grade (99.9999 %).

## Section 2. Syntheses and Characterizations

### 2.1. Cu-ZIF-**gis**

**Crystals.**  $\text{Cu}(\text{NO}_3)_2 \cdot 3\text{H}_2\text{O}$  (24.2 mg, 0.10 mmol) and 2-nitroimidazole (nlmH) (22.6 mg, 0.20 mmol) were dissolved in DMF (3.0 mL) in a 8 mL vial. The vial was tightly capped, and heated in a temperature-fixed oven at 80 °C for 24 hours. The produced blue square crystals were filtered and washed with neat DMF (3 mL  $\times$  3) and diethyl ether (3 mL  $\times$  3), and dried under reduced pressure for 1 day. The yield was 44.5% based on 1 mole of  $\text{Cu}(\text{NO}_3)_2 \cdot 3\text{H}_2\text{O}$ . Elemental microanalysis for  $\text{Cu}(\text{nlm})_2 = \text{C}_6\text{H}_4\text{N}_6\text{O}_4\text{Cu}$ : Calcd.: C, 25.05; H, 1.40; N, 29.22 %. Found: C, 25.07; H, 1.37; N, 29.39 %.

The reaction proceeds without any problems up to a 10 $\times$  scale. However, at a 30 $\times$  scale, brown crystals ( $\text{Cu}(\text{nlm})$ ) are also produced (Fig. S6). A hydrothermal reaction ( $\text{Cu}(\text{NO}_3)_2 \cdot 3\text{H}_2\text{O}$ , 24.2 mg; 2-nitroimidazole, 22.6 mg; water, 10 mL; T = 80 °C; t = 24 h) also can give Cu-ZIF-**gis** but the brown crystals are also produced as a minor product.

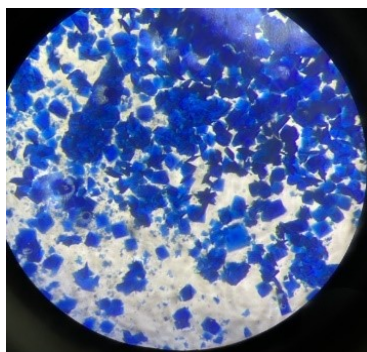

**Fig. S1.** An optical microscope image of Cu-ZIF-**gis** crystals.

When the reaction mixture for Cu-ZIF-**gis** was heated for more than a day, brown needle crystals appeared (Fig. S6); the synthesis of the brown crystals is discussed in the latter part of this section.

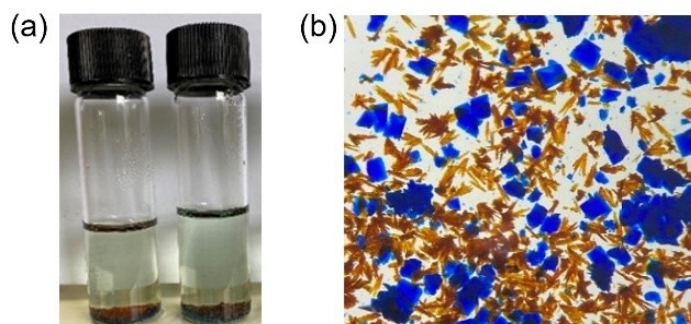

**Fig. S2.** (a) The reaction mixture for Cu-ZIF-**gis** heated for 2 days. (b) An optical microscope image of the product mixture was taken from the vials in (a).

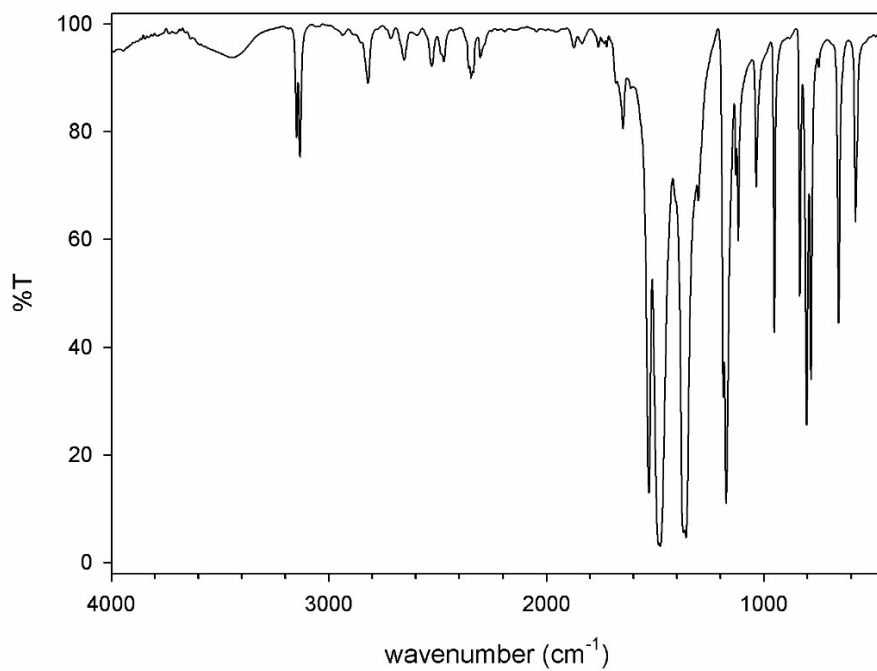

**Fig. S3.** The IR spectrum of the microcrystalline Cu-ZIF-gis.

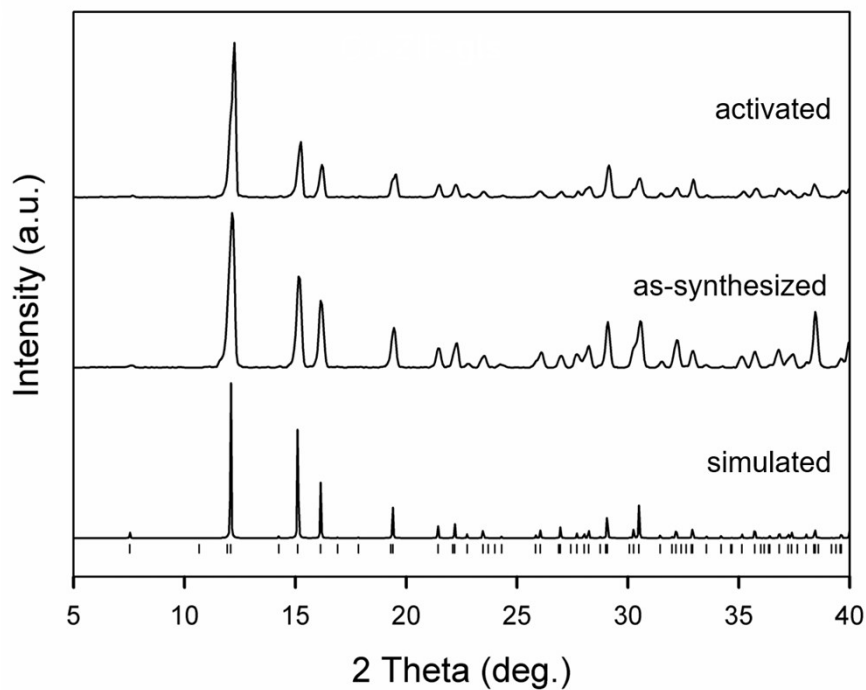

**Fig. S4.** The measured and simulated PXRD patterns for Cu-ZIF-gis. The activated sample was obtained by heating Cu-ZIF-gis at 160 °C for 10 h.

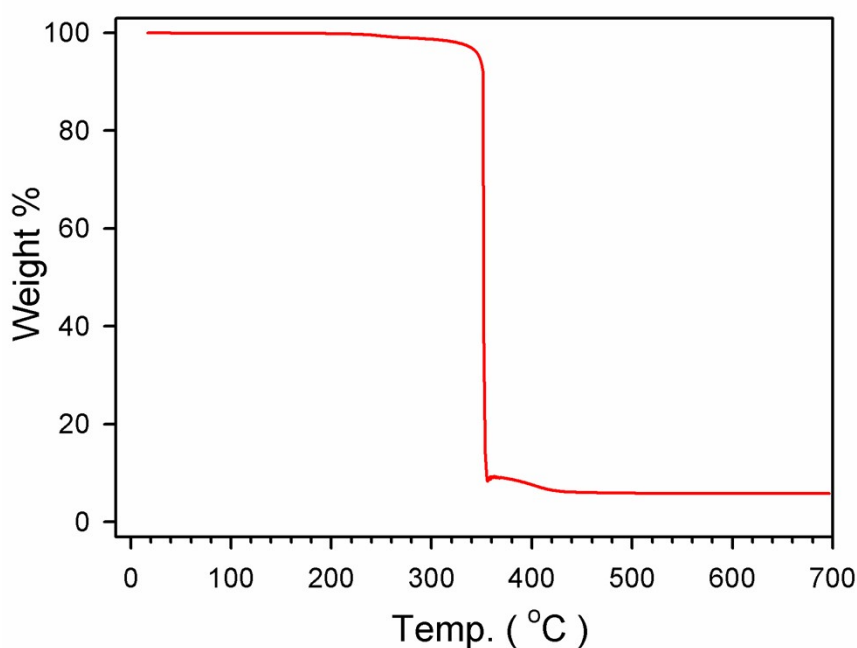

**Fig. S5.** The TGA thermogram of Cu-ZIF-gis heated at 5 °C/min in air.

We adjusted the reaction conditions to obtain phase-pure brown crystals. 2-Nitroimidazole (0.20 mmol) and  $\text{Cu}(\text{NO}_3)_2 \cdot 3\text{H}_2\text{O}$  (0.10 mmol) were placed in an 8 mL vial and dissolved in DMF solvent (3.0 mL). After adding 0.2 mL of 5M  $\text{H}_2\text{SO}_4$  solution, the capped vial was heated in a temperature-fixed oven at 90 °C for 48 hours. The collected solid was washed with neat MeOH (3 mL  $\times$  3) and diethyl ether (3 mL  $\times$  3), and dried under reduced pressure for 1 day. Elemental microanalysis for  $\text{Cu}(\text{nIm}) = \text{C}_3\text{H}_2\text{N}_3\text{O}_2\text{Cu}$ : Calcd.: C, 25.05; H, 1.15; N, 23.93 %. Found: C, 25.60; H, 1.11; N, 24.13 %.

As the crystal diffracted X-ray very weakly, the crystal structure could not be elucidated.

In the  $^1\text{H}$ -NMR spectrum of the brown crystals, only a 2-nitroimidazole signal was observed (Fig. S10).

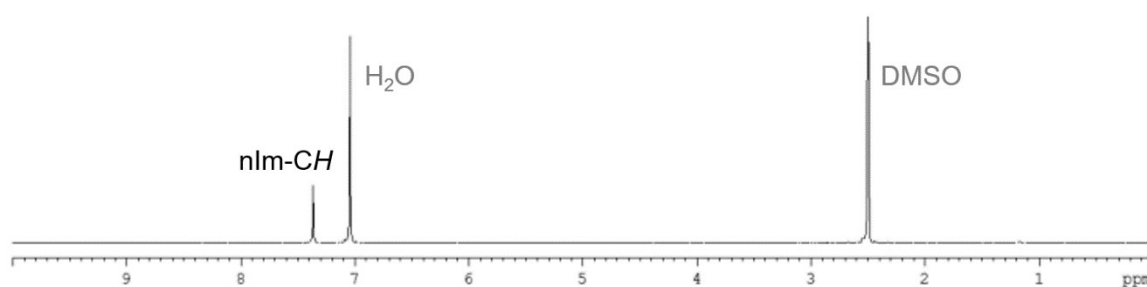

**Fig. S6.** The  $^1\text{H}$ -NMR spectrum of  $\text{Cu}(\text{nIm})$  brown crystals dissolved in DCl (20  $\mu\text{L}$ )/DMSO- $\text{d}_6$  (0.5 mL).

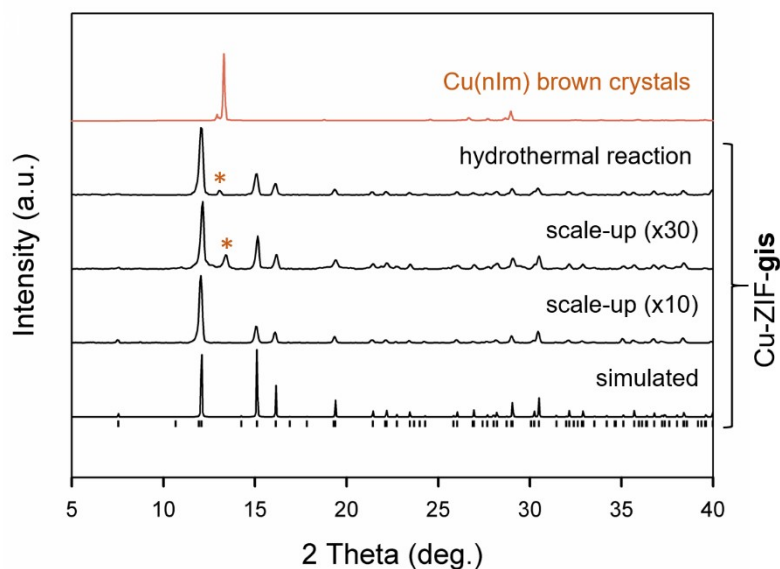

**Fig. S7.** The measured PXRD pattern of the Cu(nlm) brown crystals is compared with those of the Cu-ZIF-gis products obtained under different reaction conditions.

## 2.2. Cu-ZIF-rho

**Crystals (Method A).**  $\text{Cu}(\text{NO}_3)_2 \cdot 3\text{H}_2\text{O}$  (24.2 mg, 0.10 mmol) and 2-nitroimidazole (22.6 mg, 0.20 mmol) were dissolved in DMF (3.0 mL) in a 8 mL vial. After adding 0.2 mL of 0.5 M  $\text{HNO}_3$  aqueous solution, the vial was capped and tightly sealed with a Teflon tape, and heated in a temperature-fixed oven at 45 °C for 16 hours. As soon as the reaction finishes, produced greenish-blue crystals were filtered and washed with DMF (3 mL  $\times$  3) and diethyl ether (3 mL  $\times$  3). The washed crystals were immersed in diethyl ether (3 mL) followed by evacuation in vacuum for 1 day at room temperature. The yield was 11.2% based on 1 mole of  $\text{Cu}(\text{NO}_3)_2 \cdot 3\text{H}_2\text{O}$ . Elemental microanalysis for the evacuated  $\text{Cu}(\text{nIm})_2 = \text{C}_6\text{H}_4\text{N}_6\text{O}_4\text{Cu}$ : Calcd.: 25.05; H, 1.40; N, 29.22 %. Found: 25.05; H, 1.40; N, 29.22 %.

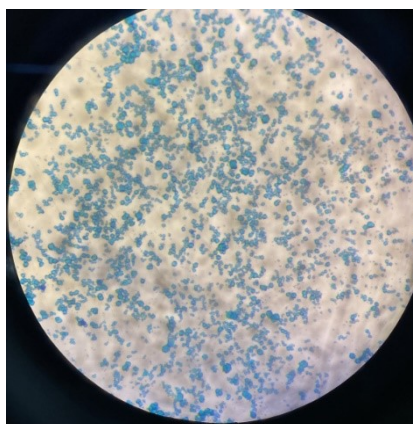

**Fig. S8.** An optical microscope image of Cu-ZIF-rho crystals.

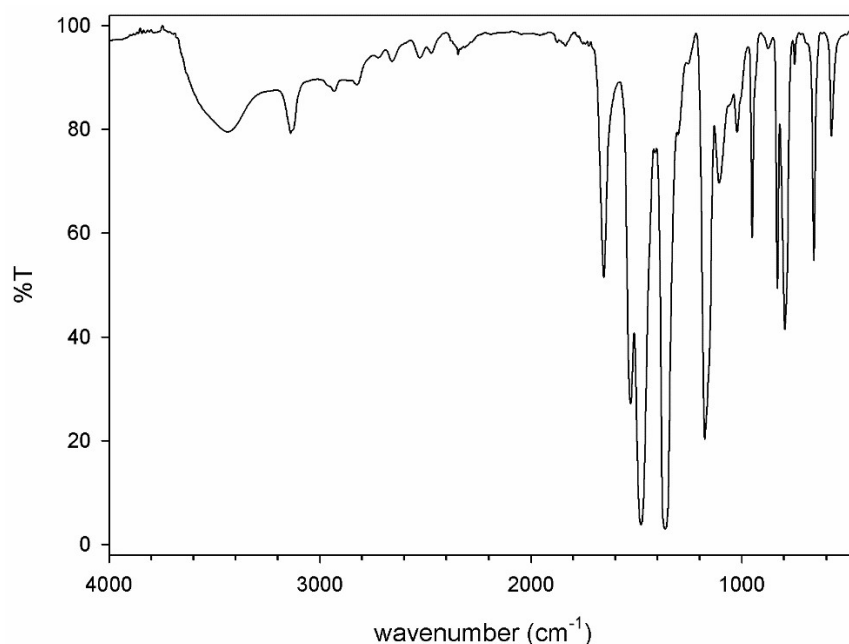

**Fig. S9.** The IR spectrum of the microcrystalline Cu-ZIF-**rho**.

The formula of the as-synthesized Cu-ZIF-**rho** was  $[\text{Cu}(\text{nIm})_2] \cdot (\text{DMF})_{1.86}$  based on the  $^1\text{H}$ -NMR analysis as follows. The as-synthesized Cu-ZIF-**rho** crystals were scattered on a filter paper, and cyclohexane was poured onto the crystals to wash out the DMF solvent on the crystal surfaces. Then, the crystals were dried in air for about 2 min until the crystals became free-running. The surface-dried crystals were quickly put in an NMR tube and dissolved with DCl (20  $\mu\text{L}$ )/DMSO- $\text{d}_6$  (0.5 mL). In the spectrum, the molar ratio between 2-nitroimidazole (*a*) and DMF (*b* + *c* + *d*) was 2.00:1.86 calculated with the integration of their signals (Fig. S14).

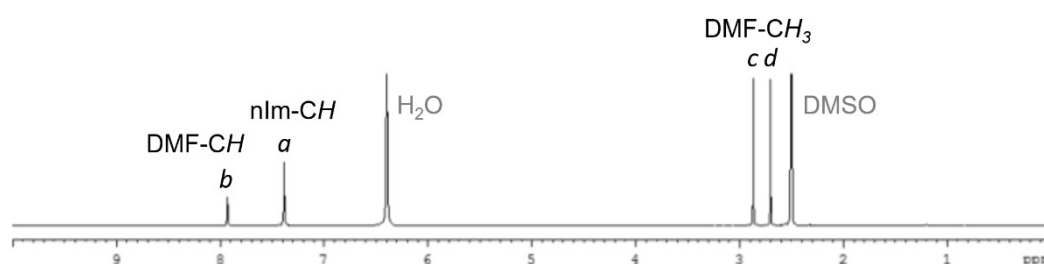

**Fig. S10.** The  $^1\text{H}$ -NMR spectrum of the as-synthesized Cu-ZIF-**rho** crystals with  $\delta$  7.93 (s, 0.4543), 7.39 (s, 1.0000), 2.87 (s, 1.4005), 2.70 (s, 1.4062), where the numbers in the parentheses are the peak integration values.

**Sub-micron crystals (Method B).** When  $\text{Cu}(\text{NO}_3)_2 \cdot 3\text{H}_2\text{O}$  (24.2 mg, 0.10 mmol), 2-nitroimidazole (22.6 mg, 0.20 mmol), and imidazole (6.81 mg, 0.10 mmol) were dissolved together in DMF (3.0 mL) at room temperature in an 8 mL vial, greenish-blue solids began to precipitate. The reaction mixture was standing on a bench for 1 h until the precipitate naturally settled to the bottom of the vial. The precipitate was filtered and washed with neat DMF (3 mL  $\times$  3) and immersed in diethyl ether (3 mL).

After 1 day, the solid was filtered and washed with diethyl ether (3 mL  $\times$  3), and dried under reduced pressure for 1 day. The yield was 28.6 % based on 1 mole of  $\text{Cu}(\text{NO}_3)_2 \cdot 3\text{H}_2\text{O}$ . The particle size was ca. 500 nm based (Fig. S15). Elemental microanalysis for the evacuated  $\text{Cu}(\text{nlm})_2 = \text{C}_6\text{H}_4\text{N}_6\text{O}_4\text{Cu}$ : Calcd.: 25.05; H, 1.40; N, 29.22 %. Found: 25.17; H, 1.40; N, 29.00 %.

The phase purity was also confirmed by measuring PXRD patterns (Fig. S16).

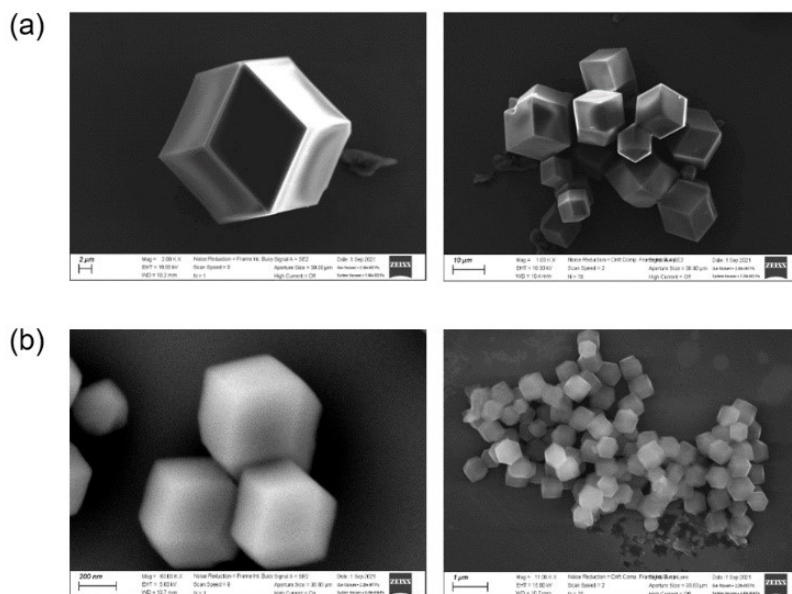

**Fig. S11.** SEM images of Cu-ZIF-**rho** rhombic dodecahedron crystals prepared by (a) Method A and (B) Method B, respectively. The average size of the crystals is (a) ca. 10  $\mu\text{m}$  and (b) 500 nm, respectively.

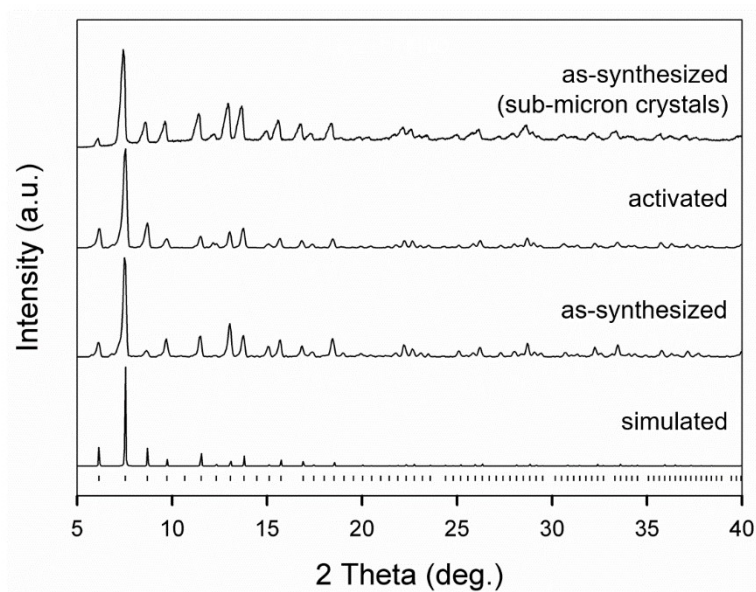

**Fig. S12.** The measured and simulated PXRD patterns for Cu-ZIF-**rho**. The activated sample was obtained by heating Cu-ZIF-**rho** at 160  $^{\circ}\text{C}$  for 10 h.



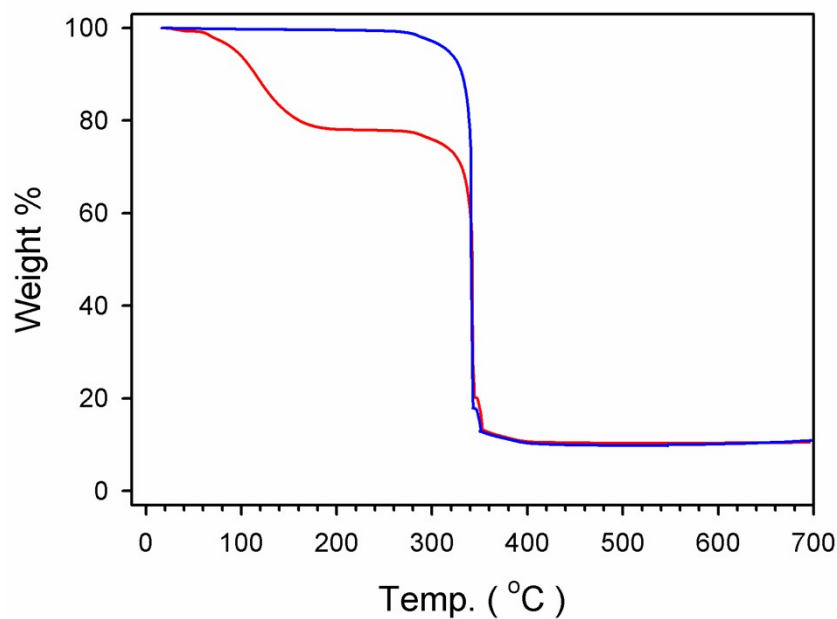

**Fig. S13.** The TGA thermograms of as-synthesized and activated Cu-ZIF-**rho** heat at 5 °C/min in air, respectively.

### 2.3. Cu-ZIF-**sql**

**Single crystals.** DMF (5.0 mL), NMP (5.0 mL), and MeOH (1.0 mL) were mixed and bubbled with N<sub>2</sub> gas for 30 min. In an 8 mL vial, CuCl (9.9 mg, 0.1 mmol) and IcaH (16.8 mg, 0.2 mmol) were placed together with 2.2 mL of the mixed solvent. The vial was tightly capped and heated in an oven at 85°C for 3 days, and only a few small light violet crystals were serendipitously obtained along with unidentified black solids; despite many attempts, the reaction could not be reproduced.

### Section 3. Chemical Stability Tests in Aqueous Solutions at pH = 2 - 12

To investigate the chemical stability of Cu-ZIF-**gis** and Cu-ZIF-**rho**, 10 mg of each Cu-ZIF sample was immersed in 5.0 mL of HCl (pH = 2 – 6) or NaOH (pH = 8 – 12) aqueous solution for seven days at room temperature. For the pH = 7 solutions, just distilled water was used. Both the Cu-ZIF-**gis** and Cu-ZIF-**rho** crystals in the pH = 2 solutions were completely dissolved. In the cases of pH = 12 solutions, the color of the crystals changed to dark brown and the solution also became pale greenish-yellow for both the Cu-ZIFs. However, the measured PXRD patterns showed that the collected Cu-ZIF crystals from the pH = 12 solutions kept the original crystallinity except for the appearance of two broad peaks at  $2\theta = 35^\circ \sim 40^\circ$  for Cu-ZIF-**rho**.

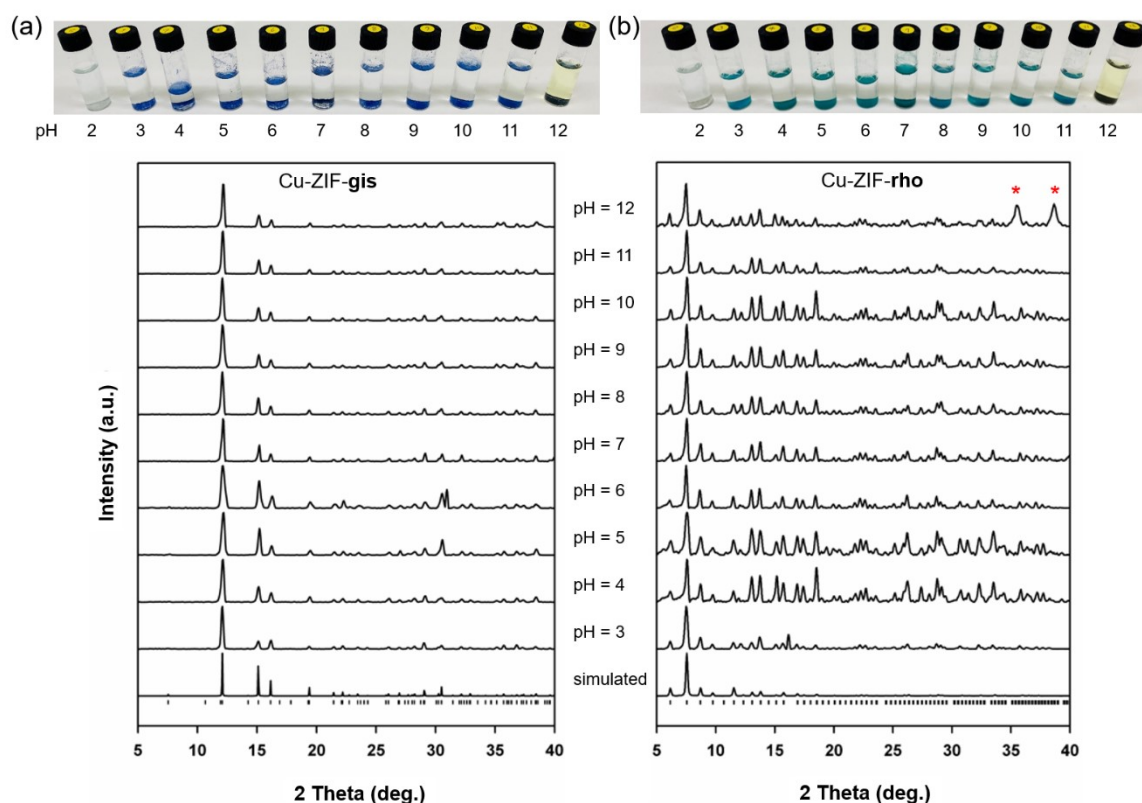

**Fig. S14.** PXRD patterns for the (a) Cu-ZIF-**gis** and (b) Cu-ZIF-**rho** samples. The samples were respectively collected from the aqueous solutions (pH = 2 – 12) after seven days at room temperature. The observed broad and intense peaks (\*) for the Cu-ZIF-**rho** at pH = 12 are ascribed to CuO (002, 11-1) and (111, 200) reflections, respectively.

**Table S1.** ICP analysis results for the selected Cu-ZIF samples in aqueous solution in **Fig. S14**. The ICP analysis was conducted using a Perkin Elmer NexION 2000 at the Analysis Center of Kyungpook National University. Following the filtering of the sample solution through a syringe filter with a pore size of 0.45  $\mu\text{m}$ , 1.0 mL of each aqueous solution was diluted 25-fold.

| Aqueous solution samples |         | Concentrations of Cu(II) in aqueous solutions by ICP analysis (atomic weight of Cu = 63.546) |      |        | Calculated Cu(II) concentrations of the initial Cu-ZIF sample (f.w. of Cu(nIm) <sub>2</sub> = 287.69) |        | Dissolved portion of Cu(II) in aqueous solutions |
|--------------------------|---------|----------------------------------------------------------------------------------------------|------|--------|-------------------------------------------------------------------------------------------------------|--------|--------------------------------------------------|
|                          |         | $\mu\text{g/L}^a$                                                                            | mg/L | mmol/L | mg/L <sup>b</sup>                                                                                     | mmol/L |                                                  |
| Cu-ZIF-gis               | pH = 3  | 3177                                                                                         | 3.18 | 0.050  | 2000                                                                                                  | 6.95   | 0.72                                             |
|                          | pH = 4  | 911                                                                                          | 0.91 | 0.014  | 2000                                                                                                  | 6.95   | 0.21                                             |
|                          | pH = 10 | 436                                                                                          | 0.44 | 0.007  | 2000                                                                                                  | 6.95   | 0.10                                             |
|                          | pH = 11 | 506                                                                                          | 0.51 | 0.008  | 2000                                                                                                  | 6.95   | 0.11                                             |
| Cu-ZIF-rho               | pH = 3  | 3674                                                                                         | 3.67 | 0.058  | 2000                                                                                                  | 6.95   | 0.83                                             |
|                          | pH = 4  | 428                                                                                          | 0.43 | 0.007  | 2000                                                                                                  | 6.95   | 0.10                                             |
|                          | pH = 10 | 232                                                                                          | 0.23 | 0.004  | 2000                                                                                                  | 6.95   | 0.05                                             |
|                          | pH = 11 | 698                                                                                          | 0.70 | 0.011  | 2000                                                                                                  | 6.95   | 0.16                                             |

<sup>a</sup> Raw data were multiplied by a dilution factor of 25.

<sup>b</sup> The initial mass of the Cu-ZIF sample in each vial is 10 mg/5 mL, which is converted to 2000 mg/L.

## Section 4. Crystal Structure Analyses

A crystal was attached to an oil-covered CryoLoop on a goniometer head. Under a liquid nitrogen stream, the crystal was mounted on a Bruker diffractometer with an ADSC Q210 CCD area detector at 2D SMC with a silicon (111) double-crystal monochromator at Pohang Accelerator Laboratory (PAL). The wavelength of the X-ray generated by PLSII 2D bending magnets was adjusted to  $\lambda = 0.70000 \text{ \AA}$ . Data collection was conducted by an omega-scan method at 100 K, 223 K and 298 K (Cu-ZIF-**gis**), 173 K (Cu-ZIF-**rho**), and 100 K (Cu-ZIF-**sql**), respectively. Over the range of the omega angle,  $180^\circ$ , diffraction images were collected with a step increase of  $1^\circ$  and an exposure time of 1 sec per frame at a detector distance of 90.00 mm, which was controlled using the PAL ADSC Quantum-210 ADX Program.<sup>51</sup> The HKL3000sm (Ver. 703r) software package<sup>52</sup> was used for the refinement of unit cell parameters and data reduction with a body-centered cubic unit cell. Absorption and decay corrections were applied. The structure was solved by direct methods using the SHELX-S program and further developed with difference Fourier syntheses, and subsequent refinement processes using the SHELX-L Version 2018/3.<sup>53</sup> All non-hydrogen atoms were refined anisotropically, and hydrogen atoms were generated and refined using a riding model, HFIX with U values at 1.2 times the equivalent isotropic U of the atoms to which they are attached.

In the case of Cu-ZIF-**sql**, the TWIN -1 0 0 0 -1 0 0 0 -1 2 and BASF instructions in SHELX-L were used for further refinements; the final BASF parameter was 0.63976. Due to the solvent disorder in Cu-ZIF-**rho**, the SQUEEZE routine in the PLATON software package was used for the final stages of the structure refinement.<sup>54</sup> Using the *fab*, *hkl*, and *res* files obtained from the PLATON SQUEEZE calculations, further refinement calculations using the ABIN instruction<sup>55</sup> were conducted. CCDC deposition numbers are 2150501 (Cu-ZIF-**sql**), 2217784 (Cu-ZIF-**gis** at 100 K), 2150502 (Cu-ZIF-**gis** at 223 K), 2175590 (Cu-ZIF-**gis** at 298 K), and 2150503 (Cu-ZIF-**rho**), respectively.

**Table S2.** Crystal data and refinement results for Cu-ZIF-**sql**. CCDC 2150501

|                                         |                                                                |                                         |                                                          |
|-----------------------------------------|----------------------------------------------------------------|-----------------------------------------|----------------------------------------------------------|
| Empirical formula                       | C <sub>8</sub> H <sub>6</sub> N <sub>4</sub> O <sub>2</sub> Cu | Formula weight                          | 253.71                                                   |
| Temperature                             | 100(2) K                                                       | Wavelength                              | 0.700 Å                                                  |
| Crystal system                          | Orthorhombic                                                   | Space group                             | <i>Aba2</i> (No. 41)                                     |
| Unit cell dimensions                    | $a = 7.9150(16)$ Å<br>$\alpha = 90^\circ$                      | $b = 13.333(3)$ Å<br>$\beta = 90^\circ$ | $c = 8.8132(18)$ Å<br>$\gamma = 90^\circ$                |
| Volume                                  | 930.1(3) Å <sup>3</sup>                                        | Z                                       | 4                                                        |
| Density (calculated)                    | 1.812 g/cm <sup>3</sup>                                        | Absorption coefficient                  | 2.240 mm <sup>-1</sup>                                   |
| F(000)                                  | 508                                                            | Crystal size                            | 0.058 × 0.043 × 0.023 mm <sup>3</sup>                    |
| $\theta$ Range for data collection      | 3.009 to 24.305°                                               | Index ranges                            | $-9 \leq h \leq 9, -15 \leq k \leq 15, -9 \leq l \leq 9$ |
| Reflections collected                   | 1589                                                           | Independent reflections                 | 629 [R(int) = 0.0447]                                    |
| Completeness to $\theta = 24.835^\circ$ | 85.1 %                                                         | Absorption correction                   | Empirical                                                |
| Max. and min. transmission              | 1.000 and 0.829                                                | Refinement method                       | Full-matrix least-squares on F <sup>2</sup>              |
| Data / restraints / parameters          | 629 / 1 / 70                                                   | Goodness-of-fit on F <sup>2</sup>       | 1.158                                                    |
| Final R indices [I > 2 $\sigma$ (I)]    | R1 = 0.0763,<br>wR2 = 0.2348                                   | R indices (all data)                    | R1 = 0.0823, wR2 = 0.2484                                |
| BASF twin parameters                    | 0.64(17), 0.36(17)                                             | Extinction coefficient                  | n/a                                                      |
| Largest diff. peak and hole             | 1.747 and -1.405 e.Å <sup>-3</sup>                             |                                         |                                                          |

**Table S3.** Selected Bond distances [Å] and angles [°] for Cu-ZIF-**sql**.

|                         |           |                                      |           |                        |           |                                      |           |
|-------------------------|-----------|--------------------------------------|-----------|------------------------|-----------|--------------------------------------|-----------|
| Cu1–N1                  | 1.993(15) | Cu1–N1 <sup>a</sup>                  | 1.993(15) | Cu1–N2 <sup>b</sup>    | 2.004(15) | Cu1–N2 <sup>c</sup>                  | 2.004(15) |
| Cu1–O1                  | 2.594(8)  | Cu1–O1 <sup>a</sup>                  | 2.594(8)  |                        |           |                                      |           |
| N1–Cu1–N1 <sup>a</sup>  | 87.2(9)   | N1 <sup>a</sup> –Cu1–N2 <sup>b</sup> | 89.3(4)   | N1–Cu1–N2 <sup>c</sup> | 89.3(4)   | N2 <sup>b</sup> –Cu1–N2 <sup>c</sup> | 94.6(9)   |
| N1–Cu1–N2 <sup>b</sup>  | 173.5(5)  | N1 <sup>a</sup> –Cu1–N2 <sup>c</sup> | 173.5(5)  |                        |           |                                      |           |
| O1 <sup>a</sup> –Cu1–O1 | 153.4(7)  |                                      |           |                        |           |                                      |           |

Symmetry transformations used to generate equivalent atoms: a)  $-x+1, -y+1, z$ ; b)  $x+1/2, -y+1, z+1/2$ ; c)  $-x+1/2, y, z+1/2$ .

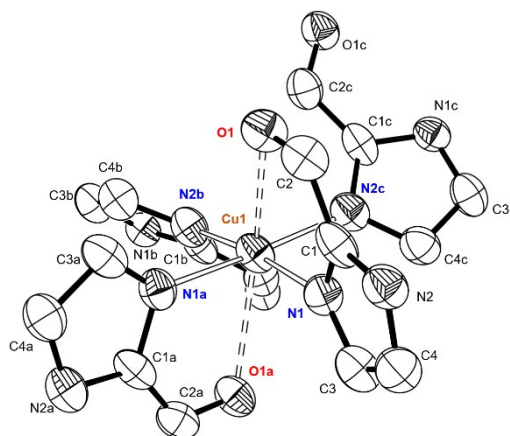

**Fig. S15.** ORTEP drawing of the coordination sphere of Cu-ZIF-**sql** with thermal ellipsoids at a 50% probability level. The atoms labeled with trailers are generated by symmetry operations: a)  $-x+1, -y+1, z$ ; b)  $x+1/2, -y+1, z+1/2$ ; c)  $-x+1/2, y, z+1/2$ . H atoms are not drawn for simplicity.

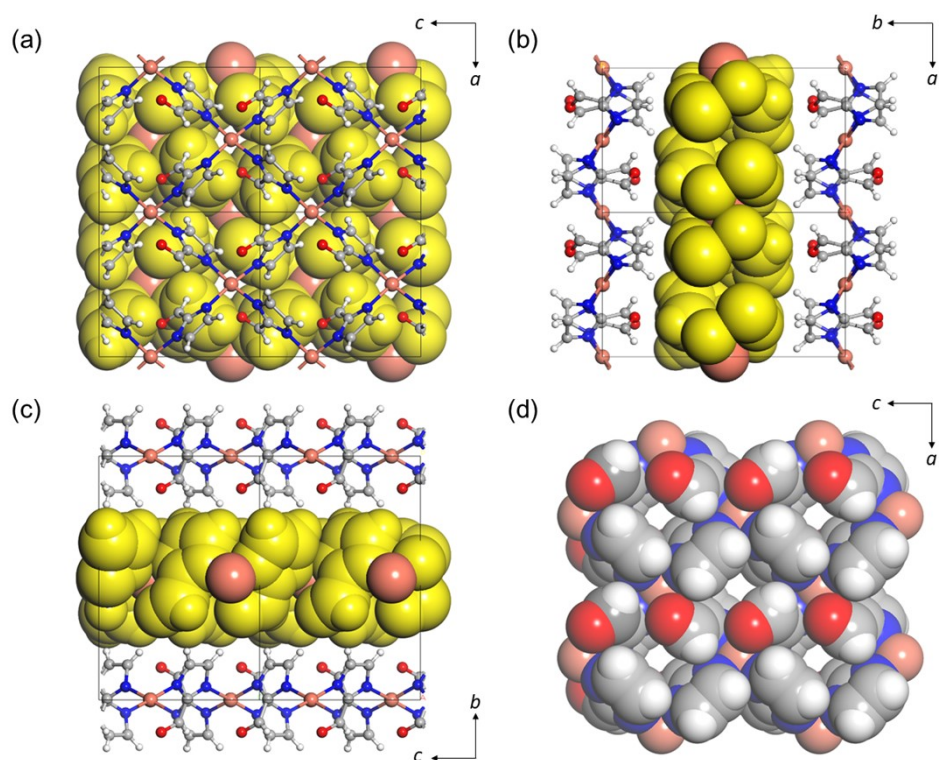

**Fig. S16.** Packing diagrams of Cu-ZIF-**sql** along (a) the  $b$ -, (b)  $c$ -, and (d)  $a$ -axis, respectively. The yellow-colored middle layer is displayed with a space-filling model, where Cu atoms are shown with brown spheres. (d) A space-filling drawing of the edge-sharing 4MRs in the top layer in (a).

**Table S4a.** Crystal data and refinement results for Cu-ZIF-gis at 100 K. **CCDC 2217784**

|                                         |                                                                |                                       |                                             |
|-----------------------------------------|----------------------------------------------------------------|---------------------------------------|---------------------------------------------|
| Empirical formula                       | C <sub>6</sub> H <sub>4</sub> N <sub>6</sub> O <sub>4</sub> Cu | Formula weight                        | 287.69                                      |
| Temperature                             | 100(2) K                                                       | Wavelength                            | 0.700 Å                                     |
| Crystal system                          | Tetragonal                                                     | Space group                           | <i>I4<sub>1</sub>md</i> (No. 109)           |
| Unit cell dimensions                    | a = 23.392(3) Å<br>$\alpha = 90^\circ$                         | b = 23.392(3) Å<br>$\beta = 90^\circ$ | c = 7.6930(15) Å<br>$\gamma = 90^\circ$     |
| Volume                                  | 4209.5(14) Å <sup>3</sup>                                      | Z                                     | 16                                          |
| Density (calculated)                    | 1.816 g/cm <sup>3</sup>                                        | Absorption coefficient                | 2.009 mm <sup>-1</sup>                      |
| F(000)                                  | 2288                                                           | Crystal size                          | 0.053 × 0.035 × 0.010 mm <sup>3</sup>       |
| $\theta$ Range for data collection      | 2.425 to 27.779°                                               | Index ranges                          | -31 ≤ h ≤ 31, -21 ≤ k ≤ 22, -10 ≤ l ≤ 10    |
| Reflections collected                   | 5016                                                           | Independent reflections               | 2753 [R(int) = 0.0948]                      |
| Completeness to $\theta = 24.835^\circ$ | 99.2 %                                                         | Absorption correction                 | Empirical                                   |
| Max. and min. transmission              | 1.000 and 0.451                                                | Refinement method                     | Full-matrix least-squares on F <sup>2</sup> |
| Data / restraints / parameters          | 2706 / 1 / 160                                                 | Goodness-of-fit on F <sup>2</sup>     | 1.030                                       |
| Final R indices [I > 2 $\sigma$ (I)]    | R1 = 0.0339,<br>wR2 = 0.0912                                   | R indices (all data)                  | R1 = 0.0350, wR2 = 0.0923                   |
| Absolute structure parameter            | 0.015(10)                                                      | Extinction coefficient                | n/a                                         |
| Largest diff. peak and hole             | 0.402 and -1.131 e.Å <sup>-3</sup>                             |                                       |                                             |

**Table S4b.** Crystal data and refinement results for Cu-ZIF-gis at 223 K. **CCDC 2150502**

|                                         |                                                                |                                       |                                             |
|-----------------------------------------|----------------------------------------------------------------|---------------------------------------|---------------------------------------------|
| Empirical formula                       | C <sub>6</sub> H <sub>4</sub> N <sub>6</sub> O <sub>4</sub> Cu | Formula weight                        | 287.69                                      |
| Temperature                             | 223(2) K                                                       | Wavelength                            | 0.700 Å                                     |
| Crystal system                          | Tetragonal                                                     | Space group                           | <i>I4<sub>1</sub>md</i> (No. 109)           |
| Unit cell dimensions                    | a = 23.426(3) Å<br>$\alpha = 90^\circ$                         | b = 23.426(3) Å<br>$\beta = 90^\circ$ | c = 7.7010(15) Å<br>$\gamma = 90^\circ$     |
| Volume                                  | 4226.1(14) Å <sup>3</sup>                                      | Z                                     | 16                                          |
| Density (calculated)                    | 1.809 g/cm <sup>3</sup>                                        | Absorption coefficient                | 2.001 mm <sup>-1</sup>                      |
| F(000)                                  | 2288                                                           | Crystal size                          | 0.050 × 0.045 × 0.040 mm <sup>3</sup>       |
| $\theta$ Range for data collection      | 1.712 to 27.814°                                               | Index ranges                          | -31 ≤ h ≤ 31, -31 ≤ k ≤ 31, -10 ≤ l ≤ 10    |
| Reflections collected                   | 17808                                                          | Independent reflections               | 2753 [R(int) = 0.0948]                      |
| Completeness to $\theta = 24.835^\circ$ | 100.0 %                                                        | Absorption correction                 | Empirical                                   |
| Max. and min. transmission              | 1.000 and 0.954                                                | Refinement method                     | Full-matrix least-squares on F <sup>2</sup> |
| Data / restraints / parameters          | 2753 / 1 / 160                                                 | Goodness-of-fit on F <sup>2</sup>     | 1.140                                       |
| Final R indices [I > 2 $\sigma$ (I)]    | R1 = 0.0385,<br>wR2 = 0.1170                                   | R indices (all data)                  | R1 = 0.0401, wR2 = 0.1184                   |
| Absolute structure parameter            | -0.010(8)                                                      | Extinction coefficient                | n/a                                         |
| Largest diff. peak and hole             | 1.259 and -0.907 e.Å <sup>-3</sup>                             |                                       |                                             |

**Table S4c.** Crystal data and refinement results for Cu-ZIF-gis at 298 K. **CCDC 2175590**

|                      |                                                                |                                       |                                         |
|----------------------|----------------------------------------------------------------|---------------------------------------|-----------------------------------------|
| Empirical formula    | C <sub>6</sub> H <sub>4</sub> N <sub>6</sub> O <sub>4</sub> Cu | Formula weight                        | 287.69                                  |
| Temperature          | 298(2) K                                                       | Wavelength                            | 0.700 Å                                 |
| Crystal system       | Tetragonal                                                     | Space group                           | <i>I4<sub>1</sub>md</i> (No. 109)       |
| Unit cell dimensions | a = 23.439(3) Å<br>$\alpha = 90^\circ$                         | b = 23.439(3) Å<br>$\beta = 90^\circ$ | c = 7.7040(15) Å<br>$\gamma = 90^\circ$ |
| Volume               | 4232.5(14) Å <sup>3</sup>                                      | Z                                     | 16                                      |
| Density (calculated) | 1.806 g/cm <sup>3</sup>                                        | Absorption coefficient                | 1.998 mm <sup>-1</sup>                  |

|                                |                                    |                                   |                                             |
|--------------------------------|------------------------------------|-----------------------------------|---------------------------------------------|
| F(000)                         | 2288                               | Crystal size                      | 0.092 × 0.090 × 0.042 mm <sup>3</sup>       |
| θ Range for data collection    | 1.711 to 27.814°                   | Index ranges                      | -31 ≤ h ≤ 31, -21 ≤ k ≤ 22, -10 ≤ l ≤ 10    |
| Reflections collected          | 5155                               | Independent reflections           | 2741 [R(int) = 0.0206]                      |
| Completeness to θ = 24.835°    | 99.1 %                             | Absorption correction             | Empirical                                   |
| Max. and min. transmission     | 1.000 and 0.578                    | Refinement method                 | Full-matrix least-squares on F <sup>2</sup> |
| Data / restraints / parameters | 2741 / 1 / 160                     | Goodness-of-fit on F <sup>2</sup> | 1.055                                       |
| Final R indices [I > 2σ(I)]    | R1 = 0.0202,<br>wR2 = 0.0579       | R indices (all data)              | R1 = 0.0206, wR2 = 0.0581                   |
| Absolute structure parameter   | 0.008(6)                           | Extinction coefficient            | n/a                                         |
| Largest diff. peak and hole    | 0.256 and -0.468 e.Å <sup>-3</sup> |                                   |                                             |

**Table S5a.** Selected Bond distances [Å] and angles [°] for Cu-ZIF-gis at 223 K.

|                         |          |                         |          |                        |          |           |          |
|-------------------------|----------|-------------------------|----------|------------------------|----------|-----------|----------|
| Cu1–N1                  | 1.988(3) | Cu1–N4                  | 1.991(3) | Cu1–N2 <sup>a</sup>    | 1.990(2) | Cu1–N6    | 2.004(2) |
| Cu1–O4                  | 2.762(2) | Cu1–O2 <sup>a</sup>     | 2.685(3) | Cu1–O1                 | 2.928(3) | Cu1–O3    | 2.851(2) |
| N4–Cu1–N6               | 90.3(1)  | N1–Cu1–N2 <sup>a</sup>  | 89.7(1)  | N4–Cu1–N2 <sup>a</sup> | 94.2(1)  | N1–Cu1–N6 | 92.2(1)  |
| N1–Cu1–N4               | 160.8(1) | N2 <sup>a</sup> –Cu1–N6 | 160.9(1) |                        |          |           |          |
| O2 <sup>a</sup> –Cu1–O4 | 152.8(1) | O1–Cu1–O3               | 153.6(1) | O4–Cu1–O1              | 129.0(1) |           |          |

Symmetry transformations used to generate equivalent atoms: a) y-1/2, -x+1, z-1/4.

**Table S5b.** Selected Bond distances [Å] and angles [°] for Cu-ZIF-gis at 223 K.

|                         |          |                         |          |                        |          |           |          |
|-------------------------|----------|-------------------------|----------|------------------------|----------|-----------|----------|
| Cu1–N1                  | 1.988(4) | Cu1–N4                  | 1.996(4) | Cu1–N2 <sup>a</sup>    | 1.996(3) | Cu1–N6    | 2.007(3) |
| Cu1–O4                  | 2.783(3) | Cu1–O2 <sup>a</sup>     | 2.688(4) | Cu1–O1                 | 2.944(4) | Cu1–O3    | 2.853(3) |
| N4–Cu1–N6               | 90.3(1)  | N1–Cu1–N2 <sup>a</sup>  | 89.5(1)  | N4–Cu1–N2 <sup>a</sup> | 94.1(1)  | N1–Cu1–N6 | 92.3(1)  |
| N1–Cu1–N4               | 161.1(2) | N2 <sup>a</sup> –Cu1–N6 | 161.2(1) |                        |          |           |          |
| O2 <sup>a</sup> –Cu1–O4 | 152.9(1) | O1–Cu1–O3               | 153.6(1) | O4–Cu1–O1              | 128.8(1) |           |          |

Symmetry transformations used to generate equivalent atoms: a) y-1/2, -x+1, z-1/4.

**Table S5c.** Selected Bond distances [Å] and angles [°] for Cu-ZIF-gis at 298 K.

|                         |          |                         |          |                        |          |           |          |
|-------------------------|----------|-------------------------|----------|------------------------|----------|-----------|----------|
| Cu1–N1                  | 1.988(2) | Cu1–N4                  | 1.995(2) | Cu1–N2 <sup>a</sup>    | 1.992(2) | Cu1–N6    | 2.007(2) |
| Cu1–O4                  | 2.787(2) | Cu1–O2 <sup>a</sup>     | 2.691(2) | Cu1–O1                 | 2.947(2) | Cu1–O3    | 2.851(2) |
| N4–Cu1–N6               | 90.2(1)  | N1–Cu1–N2 <sup>a</sup>  | 89.8(1)  | N4–Cu1–N2 <sup>a</sup> | 94.1(1)  | N1–Cu1–N6 | 92.1(1)  |
| N1–Cu1–N4               | 161.1(1) | N2 <sup>a</sup> –Cu1–N6 | 161.2(1) |                        |          |           |          |
| O2 <sup>a</sup> –Cu1–O4 | 153.0(1) | O1–Cu1–O3               | 153.6(1) | O4–Cu1–O1              | 128.7(1) |           |          |

Symmetry transformations used to generate equivalent atoms: a) y-1/2, -x+1, z-1/4.



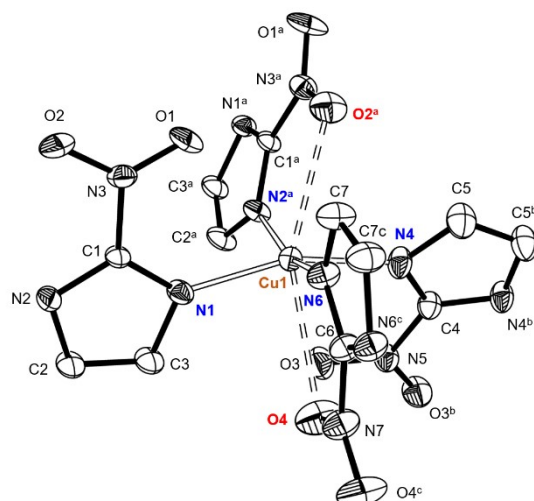

**Fig. S17.** ORTEP drawing of the coordination sphere of Cu-ZIF-**gis** at 223 K with thermal ellipsoids at a 50% probability level. The atoms labeled with trailers are generated by symmetry operations: a)  $y-1/2, -x+1, z-1/4$ ; b)  $-x, y, z$ ; c)  $x, -y+1, z$ . H atoms are not drawn for simplicity.

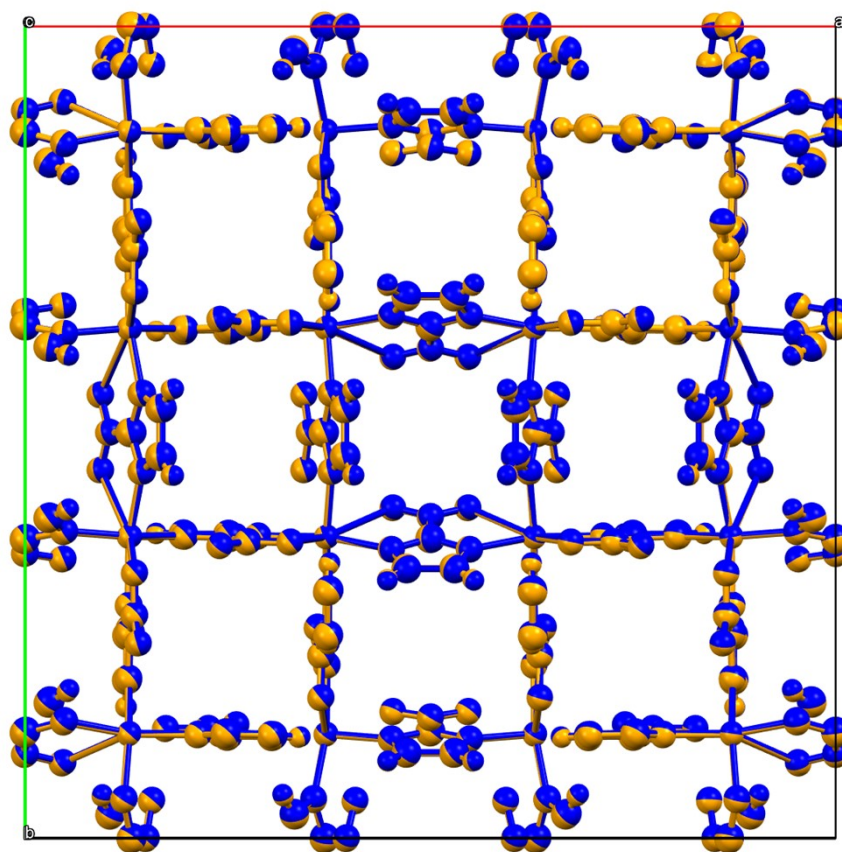

**Fig. S18.** Two crystal structures of Cu-ZIF-**gis** determined at 100 K (blue) and 298 K (orange), respectively, are overlaid.

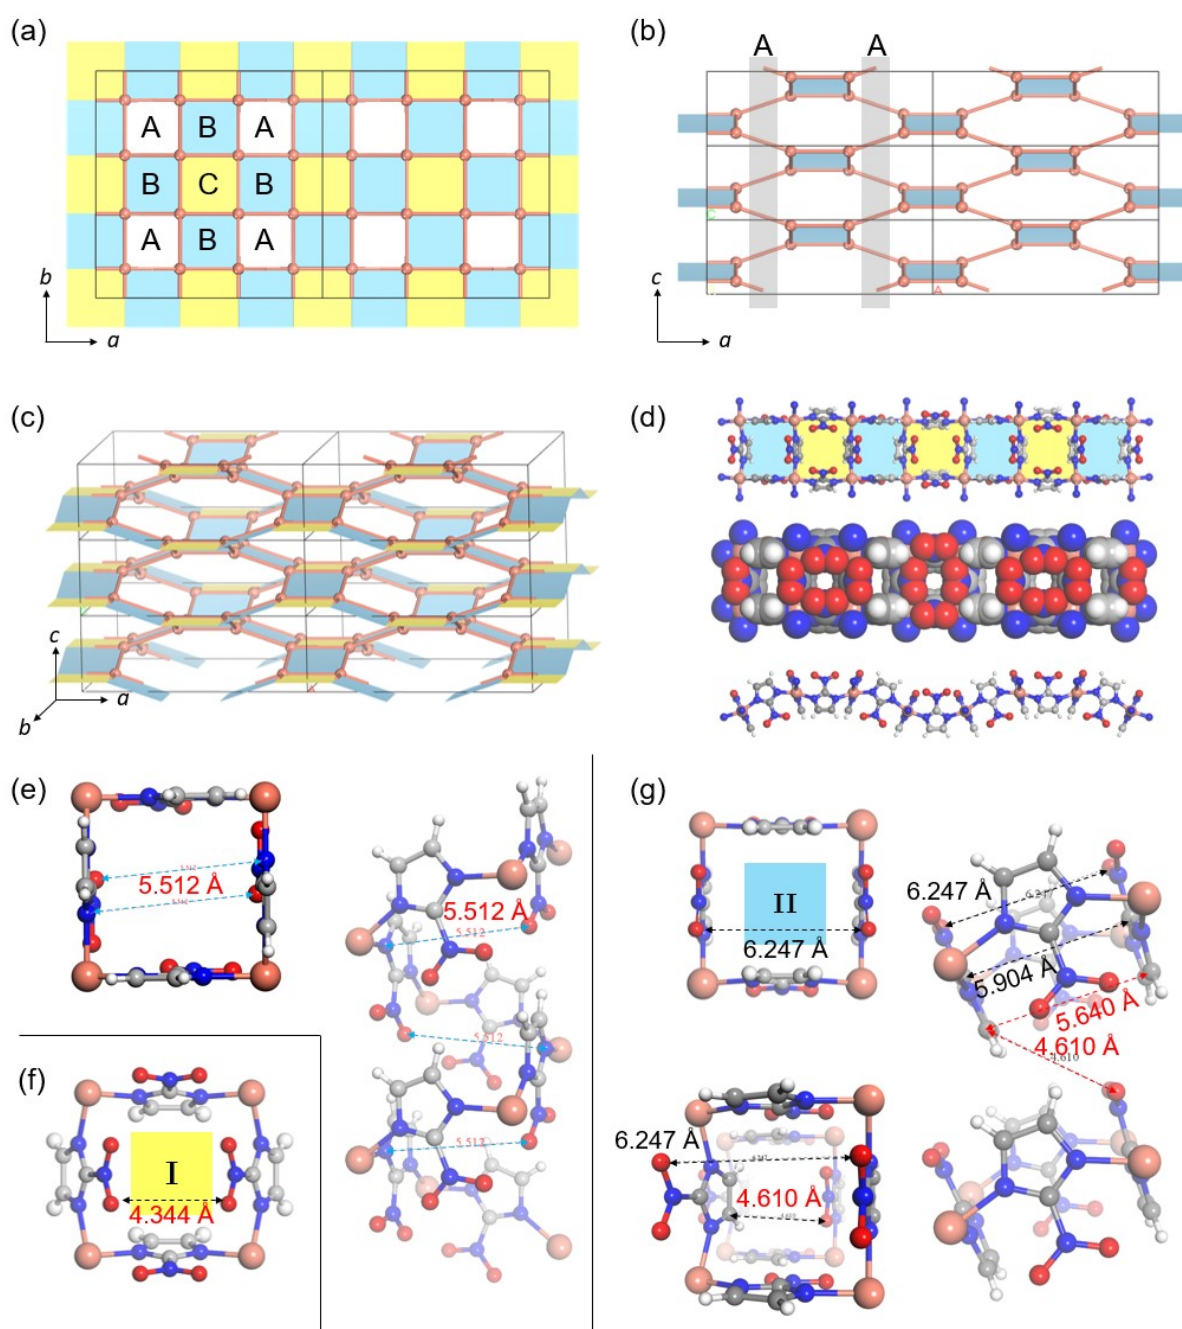

**Fig. S19.** (a) The GIS framework of Cu-ZIF-gis (223 K) is displayed with Cu<sup>2+</sup> ions along the *c*-axis of the tetragonal unit cell. Two types of 4MRs are differentiated with yellow (type I) and blue (type II) colors, respectively, where the white squares are the crosssection of pore A and not 4MRs. (b) A projection view of the GIS network along the *b*-axis. (c) A slightly-tilted view of (b) shows the three-dimensional GIS framework compressed along the *c*-axis. (d) In 4MR chains, the blue-colored 4MRs are tilted while the yellow-colored ones are not. (e) The distance of 5.512 Å defines the free opening 2.442 Å of pore A. (f) The O···O distance of 4.344 Å defines the free opening 1.304 Å of pore C. (g) The 4MR units of pore B are tilted along the *c*-axis, giving a free opening of 1.390 Å.

**Table S6.** Crystal data and refinement results for Cu-ZIF-rho (after SQUEEZE). **CCDC 2150503**

|                                         |                                                                |                                       |                                             |
|-----------------------------------------|----------------------------------------------------------------|---------------------------------------|---------------------------------------------|
| Empirical formula                       | C <sub>6</sub> H <sub>4</sub> N <sub>6</sub> O <sub>4</sub> Cu | Formula weight                        | 287.69                                      |
| Temperature                             | 173(2) K                                                       | Wavelength                            | 0.700 Å                                     |
| Crystal system                          | Cubic                                                          | Space group                           | <i>Im-3m</i> (No. 229)                      |
| Unit cell dimensions                    | a = 28.691(3) Å<br>$\alpha = 90^\circ$                         | b = 28.691(3) Å<br>$\beta = 90^\circ$ | c = 28.691(3) Å<br>$\gamma = 90^\circ$      |
| Volume                                  | 23618(8) Å <sup>3</sup>                                        | Z                                     | 48                                          |
| Density (calculated)                    | 0.971 g/cm <sup>3</sup>                                        | Absorption coefficient                | 1.074 mm <sup>-1</sup>                      |
| F(000)                                  | 6864                                                           | Crystal size                          | 0.049 × 0.045 × 0.034 mm <sup>3</sup>       |
| $\theta$ Range for data collection      | 1.398 to 27.803°                                               | Index ranges                          | -38 ≤ h ≤ 38, -27 ≤ k ≤ 27, -26 ≤ l ≤ 26    |
| Reflections collected                   | 9772                                                           | Independent reflections               | 2799 [R(int) = 0.0127]                      |
| Completeness to $\theta = 24.835^\circ$ | 99.7 %                                                         | Absorption correction                 | Empirical                                   |
| Max. and min. transmission              | 1.000 and 0.509                                                | Refinement method                     | Full-matrix least-squares on F <sup>2</sup> |
| Data / restraints / parameters          | 2799 / 0 / 84                                                  | Goodness-of-fit on F <sup>2</sup>     | 1.027                                       |
| Final R indices [I > 2 $\sigma$ (I)]    | R1 = 0.0219,<br>wR2 = 0.0667                                   | R indices (all data)                  | R1 = 0.0237, wR2 = 0.0674                   |
| Absolute structure parameter            | -0.010(8)                                                      | Extinction coefficient                | n/a                                         |
| Largest diff. peak and hole             | 0.314 and -0.411 e.Å <sup>-3</sup>                             |                                       |                                             |

Our SQUEEZE calculations show 2736 electrons present in the pores, which is equivalent to 68.4 DMF molecules based on 40 DMF(C<sub>3</sub>H<sub>7</sub>NO) electrons. However, NMR analysis suggested 89.3 DMF molecules for Cu-ZIF-rho (Cu(nIm)<sub>2</sub>(DMF)<sub>1.86</sub>, Z = 48). Thus, SQUEEZE electron densities are lower than NMR methods. DMF solvent molecules in open pores may have evaporated during crystal mounting, or their electron densities may not be accurately reflected due to pore disorders.

**Table S7.** Selected Bond distances [Å] and angles [°] for Cu-ZIF-rho.

|                        |           |                                      |           |                         |           |                         |           |
|------------------------|-----------|--------------------------------------|-----------|-------------------------|-----------|-------------------------|-----------|
| Cu1–N1                 | 2.0055(9) | Cu1–N1 <sup>a</sup>                  | 2.0054(9) | Cu1–N3                  | 1.9838(9) | Cu1–N3 <sup>a</sup>     | 1.9838(9) |
| Cu1–O1                 | 2.6394(8) | Cu1–O1 <sup>a</sup>                  | 2.6395(8) | Cu1–O2                  | 2.9185(9) | Cu1–O2 <sup>a</sup>     | 2.9184(9) |
| N3–Cu1–N3 <sup>a</sup> | 95.62(5)  | N3–Cu1–N1 <sup>a</sup>               | 93.23(3)  | N3 <sup>a</sup> –Cu1–N1 | 93.23(3)  | N1 <sup>a</sup> –Cu1–N1 | 91.42(5)  |
| N3–Cu1–N1              | 151.84(3) | N3 <sup>a</sup> –Cu1–N1 <sup>a</sup> | 151.84(3) |                         |           |                         |           |
| O1–Cu1–O1 <sup>a</sup> | 137.18(3) | O1 <sup>a</sup> –Cu1–O2 <sup>a</sup> | 136.10(2) | O1–Cu1–O2               | 136.10(2) | O2 <sup>a</sup> –Cu1–O2 | 136.22(4) |

Symmetry transformations used to generate equivalent atoms: a) y+1/2, x-1/2, -z+3/2

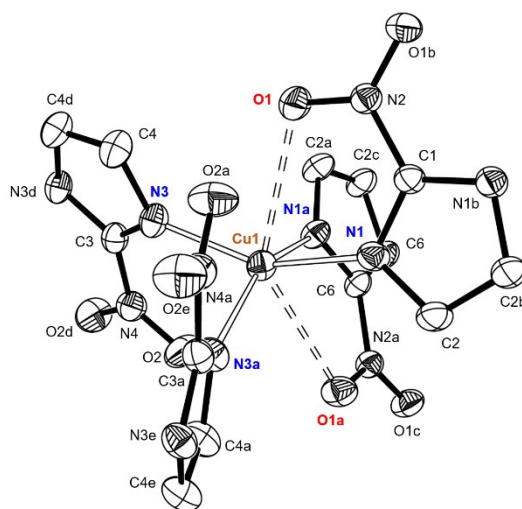

**Fig. S20.** ORTEP drawing of the coordination sphere of Cu-ZIF-**rho** with thermal ellipsoids at a 50% probability level. The atoms labelled with trailers are generated by symmetry operations: a)  $y+1/2, x-1/2, -z+3/2$ ; b)  $x, -y+1, z$ ; c)  $-y+3/2, x-1/2, -z+3/2$ ; d)  $x, -z+1, -y+1$ ; e)  $-z+3/2, x-1/2, y+1/2$ . H atoms are not drawn for simplicity.

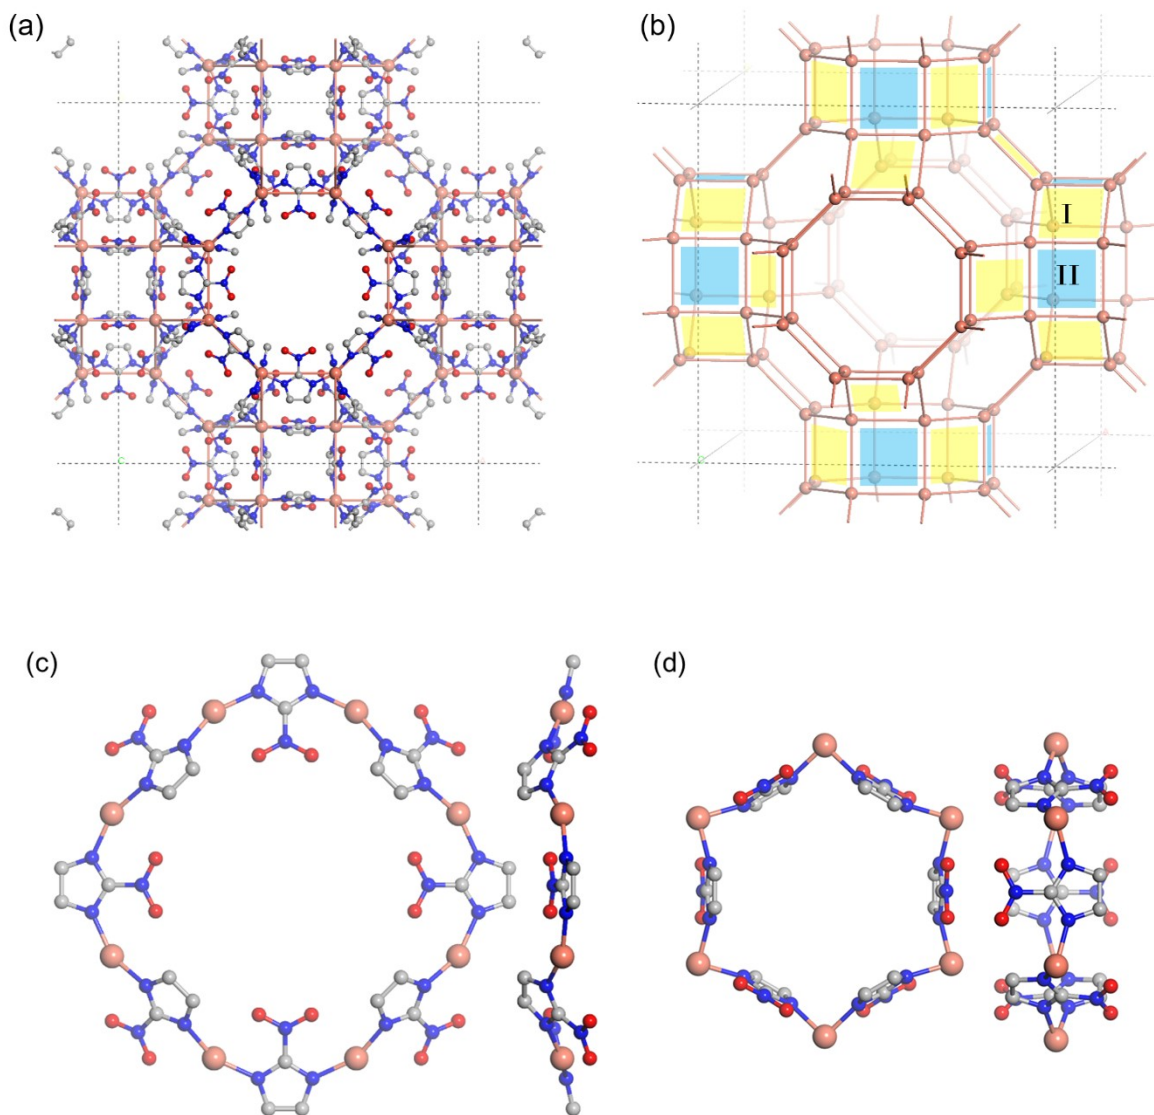

**Fig. S21.** (a) The framework of Cu-ZIF-**rho** is represented along the *c*-axis of a cubic unit cell. (b) The framework connectivity is simply represented with Cu<sup>2+</sup> ions, where two types of 4MRs are highlighted with yellow (I) and blue (II) colors, respectively. Note that the I and II 4MRs share their edges or corners with 6MRs, respectively. (c) The front and side views of an 8MR and (d) a 6MR are displayed with ball-and-stick models, respectively, to show the relative orientations of the imidazoles. H atoms are not shown for simplicity.



**Table S8.** Angle distortion indices of selected ZIFs:  $DI = [\sum_{i=1}^6 |\Phi_i - \Phi_{avg}|] / (6\Phi_{avg})$  and  $RDI = DI/0.333$ .

| ZIF                | Net                | Tetrahedral bond angles, $\Phi$ ( $\angle$ N-M-N) |          |          |          |          |          |              | DI    | RDI   | Ref.      |
|--------------------|--------------------|---------------------------------------------------|----------|----------|----------|----------|----------|--------------|-------|-------|-----------|
|                    |                    | $\Phi_1$                                          | $\Phi_2$ | $\Phi_3$ | $\Phi_4$ | $\Phi_5$ | $\Phi_6$ | $\Phi_{avg}$ |       |       |           |
| (Square planar)    | (D <sub>4h</sub> ) | 90.0                                              | 90.0     | 90.0     | 90.0     | 180.0    | 180.0    | 120.0        | 0.333 | 1.000 | -         |
| Cu-ZIF- <b>sql</b> | sql                | 87.2                                              | 89.3     | 89.3     | 94.6     | 173.5    | 173.5    | 117.90       | 0.314 | 0.943 | this work |
| Cu-ZIF- <b>gis</b> | GIS                | 89.5                                              | 90.3     | 92.3     | 94.1     | 161.1    | 161.2    | 114.75       | 0.270 | 0.809 | this work |
| Cu-ZIF- <b>rho</b> | RHO                | 91.4                                              | 93.2     | 93.2     | 95.6     | 151.8    | 151.8    | 112.86       | 0.230 | 0.691 | this work |
| <b>B</b>           | SOD                | 84.4                                              | 92.1     | 95.9     | 104.2    | 139.6    | 154.8    | 111.83       | 0.211 | 0.633 | S6        |
| <b>G</b> (avg.)    | 4,4L37             |                                                   |          |          |          |          |          |              | 0.208 | 0.623 | S6        |
|                    |                    | 92.6                                              | 95.2     | 98.8     | 99.4     | 138.4    | 142.5    | 111.15       | 0.176 |       |           |
|                    |                    | 88.1                                              | 88.1     | 97.7     | 97.7     | 154.0    | 154.0    | 113.27       | 0.240 |       |           |
| <b>O</b> (avg.)    | mog                |                                                   |          |          |          |          |          |              | 0.204 | 0.611 | S6        |
|                    |                    | 94.1                                              | 95.2     | 98.3     | 98.3     | 140.8    | 140.8    | 111.24       | 0.177 |       |           |
|                    |                    | 92.4                                              | 92.6     | 93.3     | 94.8     | 146.3    | 157.3    | 112.78       | 0.231 |       |           |
| CdIF-9             | RHO                | 95.9                                              | 95.9     | 100.6    | 105.9    | 131.9    | 131.9    | 110.33       | 0.130 | 0.391 | S7        |
| CdIF-8             | SOD                | 99.9                                              | 99.9     | 99.9     | 99.9     | 131.1    | 131.1    | 110.28       | 0.126 | 0.378 | S7        |
| CoNIm(RHO)         | RHO                | 98.2                                              | 99.6     | 99.6     | 104.5    | 129.4    | 129.4    | 110.12       | 0.116 | 0.350 | S8        |
| ZIF-74             | GIS                | 98.7                                              | 104.6    | 108.8    | 108.9    | 113.0    | 122.9    | 109.51       | 0.052 | 0.155 | S9        |
| ZIF-68             | GME                | 103.8                                             | 104.7    | 107.2    | 107.4    | 108.9    | 123.5    | 109.23       | 0.044 | 0.131 | S9        |
| ZIF-71             | RHO                | 102.1                                             | 105.0    | 108.3    | 110.2    | 114.5    | 116.6    | 109.45       | 0.039 | 0.103 | S9        |
| ZIF-412(avg.)      | ucb                |                                                   |          |          |          |          |          |              | 0.039 | 0.118 | S10       |
|                    |                    | 99.6                                              | 105.7    | 107.6    | 108.6    | 113.3    | 121.2    | 109.34       | 0.048 |       |           |
|                    |                    | 103.9                                             | 105.0    | 105.3    | 111.4    | 112.4    | 118.3    | 109.37       | 0.042 |       |           |
|                    |                    | 104.2                                             | 108.0    | 108.2    | 108.3    | 113.3    | 114.5    | 109.42       | 0.027 |       |           |
| ZIF-300(avg.)      | CHA                |                                                   |          |          |          |          |          |              | 0.038 | 0.113 | S11       |
|                    |                    | 102.4                                             | 107.2    | 108.1    | 109.5    | 109.7    | 119.5    | 109.40       | 0.032 |       |           |
|                    |                    | 103.9                                             | 104.9    | 105.5    | 111.5    | 112.9    | 118.1    | 109.47       | 0.043 |       |           |
| ZIF-7              | SOD                | 103.6                                             | 105.3    | 107.7    | 111.6    | 113.6    | 115.2    | 109.51       | 0.036 | 0.108 | S12       |
| CdIF-6             | ANA                | 102.9                                             | 104.9    | 111.5    | 111.5    | 113.2    | 113.2    | 109.52       | 0.034 | 0.103 | S7        |
| ZIF-12             | RHO                | 105.0                                             | 105.4    | 107.9    | 109.0    | 111.2    | 117.5    | 109.33       | 0.031 | 0.092 | S12       |
| ZIF-11             | RHO                | 104.7                                             | 107.0    | 107.5    | 109.9    | 111.3    | 116.1    | 109.43       | 0.028 | 0.083 | S12       |
| CdIF-2             | MER                | 104.6                                             | 105.4    | 110.1    | 110.6    | 111.2    | 115.1    | 109.49       | 0.028 | 0.083 | S7        |
| ZIF-20             | LTA                | 104.7                                             | 106.4    | 108.3    | 110.5    | 111.1    | 115.5    | 109.44       | 0.027 | 0.081 | S13       |
| ZIF-6              | GIS                | 107.6                                             | 107.7    | 107.7    | 109.1    | 109.1    | 115.4    | 109.43       | 0.018 | 0.054 | S12       |
| ZIF-3              | DFT                | 107.1                                             | 107.5    | 108.1    | 110.0    | 111.4    | 112.5    | 109.44       | 0.017 | 0.051 | S12       |
| ZIF-10             | MER                | 106.2                                             | 108.4    | 108.9    | 109.9    | 111.0    | 112.5    | 109.47       | 0.015 | 0.045 | S12       |
| ZIF-65             | SOD                | 107.4                                             | 107.4    | 110.5    | 110.5    | 110.5    | 110.5    | 109.48       | 0.013 | 0.038 | S9        |
| CdIF-1             | SOD                | 109.2                                             | 109.2    | 109.2    | 109.2    | 110.0    | 110.0    | 109.47       | 0.003 | 0.010 | S7        |
| ZIF-8              | SOD                | 109.3                                             | 109.3    | 109.3    | 109.3    | 109.8    | 109.8    | 109.47       | 0.002 | 0.006 | S12       |
| (Tetrahedral)      | (T <sub>d</sub> )  | 109.5                                             | 109.5    | 109.5    | 109.5    | 109.5    | 109.5    | 109.47       | 0.000 | 0.000 | -         |

**Table S9.** Internal angles of 4MRs for selected ZIFs.

| ZIF                | Net    | 4MR Internal angles, $\theta$ ( $\angle$ N-M-N) |            |            |            |                       | $\theta_{\text{avg}}/131.9^\circ$ | Ref.      |
|--------------------|--------|-------------------------------------------------|------------|------------|------------|-----------------------|-----------------------------------|-----------|
|                    |        | $\theta_1$                                      | $\theta_2$ | $\theta_3$ | $\theta_4$ | $\theta_{\text{avg}}$ |                                   |           |
| Cu-ZIF- <b>sql</b> | sql    | 87.15                                           | 89.35      | 89.35      | 94.64      | 90.12                 | 0.68                              | this work |
| Cu-ZIF- <b>gis</b> | GIS    | 90.26                                           | 90.26      | 90.26      | 90.26      | 90.26                 | 0.68                              | this work |
|                    |        | 92.27                                           | 92.27      | 94.09      | 94.09      | 93.18                 | 0.71                              |           |
| Cu-ZIF- <b>rho</b> | RHO    | 91.42                                           | 91.42      | 91.42      | 91.42      | 91.42                 | 0.69                              | this work |
|                    |        | 93.23                                           | 93.23      | 93.23      | 93.23      | 93.23                 | 0.71                              |           |
| <b>B</b>           | SOD    | 84.44                                           | 84.44      | 95.88      | 95.88      | 90.16                 | 0.68                              | S6        |
| <b>G</b>           | 4,4L37 | -                                               | -          | -          | -          | -                     | -                                 | S6        |
| <b>O</b>           | mog    | 98.30                                           | 98.30      | 98.35      | 98.35      | 98.33                 | 0.75                              | S6        |
| CdIF-9             | RHO    | 100.63                                          | 100.63     | 100.63     | 100.63     | 100.63                | 0.76                              | S7        |
|                    |        | 131.87                                          | 131.87     | 131.87     | 131.87     | 131.87                | 1.00                              |           |
| CdIF-8             | SOD    | 131.13                                          | 131.13     | 131.13     | 131.13     | 131.13                | 0.99                              | S7        |
| CoNIm(RHO)         | RHO    | 98.24                                           | 98.24      | 98.24      | 98.24      | 98.24                 | 0.74                              | S8        |
|                    |        | 129.36                                          | 129.36     | 129.36     | 129.36     | 129.36                | 0.98                              |           |
| ZIF-74             | GIS    | 122.93                                          | 122.93     | 122.93     | 122.93     | 122.93                | 0.93                              | S9        |
|                    |        | 108.84                                          | 108.84     | 108.92     | 108.92     | 108.88                | 0.83                              |           |
| ZIF-68             | GME    | 123.49                                          | 123.49     | 123.49     | 123.49     | 123.49                | 0.94                              | S9        |
|                    |        | 107.19                                          | 107.19     | 107.19     | 107.19     | 107.19                | 0.81                              |           |
|                    |        | 108.90                                          | 108.90     | 108.90     | 108.90     | 108.90                | 0.83                              |           |
| ZIF-71             | RHO    | 104.97                                          | 104.97     | 104.97     | 104.97     | 104.97                | 0.80                              | S9        |
|                    |        | 108.27                                          | 108.27     | 108.27     | 108.27     | 108.27                | 0.82                              |           |
|                    |        | 102.15                                          | 102.15     | 102.15     | 102.15     | 102.15                | 0.77                              |           |
| ZIF-412            | ucb    | 104.17                                          | 104.17     | 108.57     | 108.57     | 106.37                | 0.81                              | S10       |
|                    |        | 118.26                                          | 118.26     | 121.18     | 121.18     | 119.72                | 0.91                              |           |
|                    |        | 111.38                                          | 111.38     | 113.31     | 113.31     | 112.35                | 0.85                              |           |
| ZIF-300            | CHA    | 104.87                                          | 104.87     | 108.08     | 108.08     | 106.48                | 0.81                              | S11       |
|                    |        | 102.44                                          | 103.91     | 105.47     | 107.18     | 104.75                | 0.79                              |           |
| ZIF-7              | SOD    | 103.61                                          | 103.61     | 105.31     | 105.31     | 104.46                | 0.79                              | S12       |
| CdIF-6             | ANA    | 111.48                                          | 111.48     | 111.48     | 111.48     | 111.48                | 0.85                              | S7        |
| ZIF-12             | RHO    | 105.03                                          | 105.03     | 105.03     | 105.03     | 105.03                | 0.80                              | S12       |
|                    |        | 105.38                                          | 105.38     | 105.38     | 105.38     | 105.38                | 0.80                              |           |
|                    |        | 108.98                                          | 108.98     | 108.98     | 108.98     | 108.98                | 0.83                              |           |
| ZIF-11             | RHO    | 104.72                                          | 104.72     | 104.72     | 104.72     | 104.72                | 0.79                              | S12       |
|                    |        | 107.46                                          | 107.46     | 107.46     | 107.46     | 107.46                | 0.81                              |           |
|                    |        | 107.04                                          | 107.04     | 107.04     | 107.04     | 107.04                | 0.81                              |           |

**Table S9.** (Continued)

| ZIF    | Net | 4MR Internal angles, $\theta$ ( $\angle$ N-M-N) |            |            |            |                       | $\theta_{\text{avg}}/131.9^\circ$ | Ref. |
|--------|-----|-------------------------------------------------|------------|------------|------------|-----------------------|-----------------------------------|------|
|        |     | $\theta_1$                                      | $\theta_2$ | $\theta_3$ | $\theta_4$ | $\theta_{\text{avg}}$ |                                   |      |
| CdIF-2 | MER | 111.23                                          | 111.23     | 111.40     | 111.40     | 111.32                | 0.84                              | S7   |
|        |     | 109.82                                          | 109.82     | 110.12     | 110.12     | 109.97                | 0.83                              |      |
| ZIF-20 | LTA | 104.73                                          | 104.73     | 104.73     | 104.73     | 104.73                | 0.79                              | S13  |
|        |     | 110.54                                          | 110.54     | 110.54     | 110.54     | 110.54                | 0.84                              |      |
|        |     | 106.42                                          | 106.42     | 106.42     | 106.42     | 106.42                | 0.81                              |      |
| ZIF-6  | GIS | 115.39                                          | 115.39     | 115.39     | 115.39     | 115.39                | 0.88                              | S12  |
|        |     | 107.73                                          | 107.73     | 107.73     | 107.73     | 107.73                | 0.82                              |      |
| ZIF-3  | DFT | 110.04                                          | 110.04     | 110.04     | 110.04     | 110.04                | 0.83                              | S12  |
|        |     | 107.51                                          | 107.51     | 107.51     | 107.51     | 107.51                | 0.82                              |      |
| ZIF-10 | MER | 109.88                                          | 109.88     | 109.88     | 109.88     | 109.88                | 0.83                              | S12  |
|        |     | 110.95                                          | 110.95     | 110.95     | 110.95     | 110.95                | 0.84                              |      |
| ZIF-65 | SOD | 107.41                                          | 107.41     | 107.41     | 107.41     | 107.41                | 0.81                              | S9   |
| CdIF-1 | SOD | 110.00                                          | 110.00     | 110.00     | 110.00     | 110.00                | 0.83                              | S7   |
| ZIF-8  | SOD | 109.81                                          | 109.81     | 109.81     | 109.81     | 109.81                | 0.83                              | S12  |

## Section 5. H<sub>2</sub> Adsorption Measurements for Cu-ZIF-gis at Low Temperature

### 5.1. H<sub>2</sub> and N<sub>2</sub> adsorption isotherms at 77 K

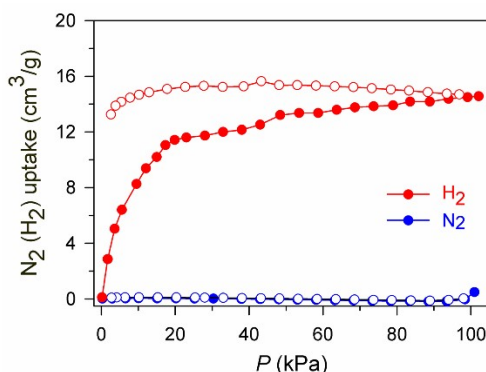

**Fig. S22.** N<sub>2</sub> and H<sub>2</sub> gas adsorption-desorption isotherms of Cu-ZIF-gis were measured at 77 K, respectively, using a BELSORP-mini (BEL-Japan, INC.). Filled and open circles represent the adsorption and desorption branches, respectively.

### 5.2. H<sub>2</sub> adsorption isotherms at 20 K – 150 K

The hydrogen adsorption isotherms of Cu-ZIF-gis from 150 K down to 20 K were further measured with a fully automated Sieverts apparatus (Autosorb-iQ2, Quantachrome Instruments) utilizing a temperature-controlled cryostat. Around 100 mg of the sample was activated at 160 °C under vacuum for 10 h. The temperature stability was less than 0.05 K during isotherm measurements at each temperature. Each isotherm measurement takes ca. 1~2 weeks.

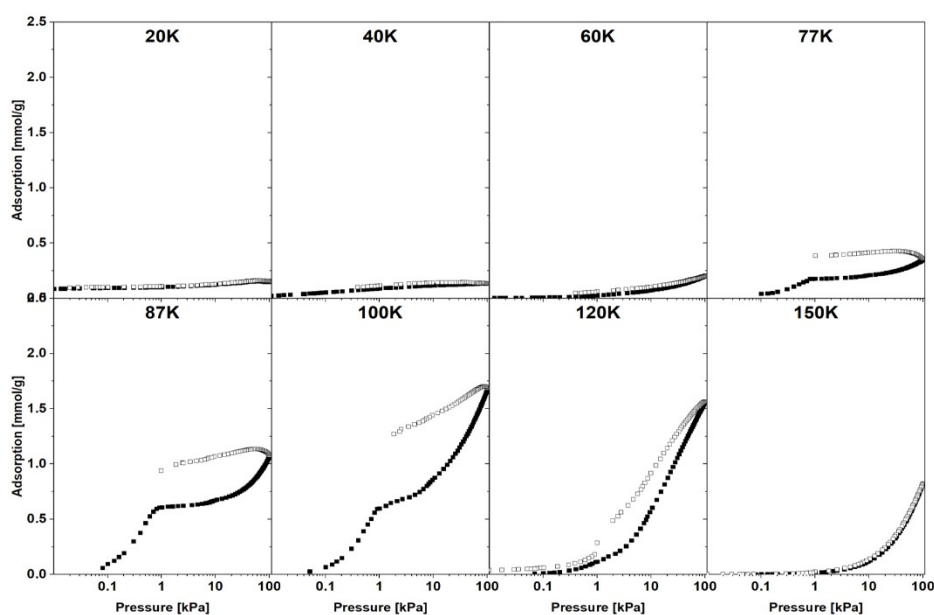

**Fig. S23.** High-resolution low-pressure hydrogen adsorption and desorption isotherms of Cu-ZIF-gis at various temperatures: 20 K, 40 K, 60 K, 77 K, 87K, 100 K, 120K, and 150 K. Closed and open symbols represent the absorption and desorption.



### 5.3. Thermal desorption spectra measurements of H<sub>2</sub>

The thermal desorption spectrum of H<sub>2</sub> was performed in a home-built device with ca. 3.61 mg of Cu-ZIF-**gis** activated at 160 °C for 10 h under vacuum.<sup>S14</sup> The sample was exposed to H<sub>2</sub> atmosphere (1 bar) either at 20 K or RT, then rapidly cooled to 17 K. The unobserved residual gas molecules were removed by evacuation. Afterward, the sample was heated to 250 K with a linear heating rate of 6 K/min. The desorbed gas was continuously detected using a quadrupole mass spectrometer (QMS) and a pressure increase in the sample chamber. The area under the desorption peak is proportional to the desorbing amount of hydrogen, which can be quantified after careful calibration by TiH<sub>2</sub> of the TDS apparatus. We observed a weight change of 0.439% which corresponds to the storage of 2.187 mmol H<sub>2</sub> in 1.0 g of Cu-ZIF-**gis**.

A series of the thermal desorption spectra for the H<sub>2</sub>-loaded Cu-ZIF-**gis** at 100 K with different heating rates made it possible to assess the H<sub>2</sub> desorption energy (Fig. S29). The desorption energy was determined by applying the Polanyi-Wigner equation to thermal desorption spectra.<sup>S15</sup> This method is based on the assumption that adsorption and desorption are reversible processes, and the desorption energy is independent of the coverage or temperature. A plot of  $\ln\left(\frac{\beta}{T_{max}^2}\right)$  versus  $1/T_{max}$  yields a straight line, and the desorption energy is determined from the slope.

$$\ln\left(\frac{\beta}{T_{max}^2}\right) = -\frac{E_{des}}{RT_{max}} + \ln\left(\frac{vR\theta_0}{E_{des}}\right)$$

(: coverage,  $\beta$ : heating rate,  $v$ : frequency factor,  $E_{des}$ : desorption energy,  $R$ : gas constant,  $T$ : temperature)

After exposure to 1 bar H<sub>2</sub> atmosphere at 100 K (30 min exposure time), the sample was cooled to 18 K. Then, the thermal desorption spectra were recorded by applying the different heating rates of 1 K/min, 3 K/min, 4.5 K/min, and 6 K/min. The determined desorption energy of hydrogen is 22.8 kJ/mol.

## Section 6. Calculations of the $Q_{st}$ values for Cu-ZIF-gis

**Table S10.** Selected Bond distances [ $\text{\AA}$ ] and angles [ $^\circ$ ] for Cu-ZIF-rho.

| Fitting methods | $-\Delta H = Q_{st}$ (kJ/mol) at the $H_2$ loading amount of 0.01 mmol/g |                                        |
|-----------------|--------------------------------------------------------------------------|----------------------------------------|
|                 | *Low pressure isotherms (120 K – 150 K)                                  | High pressure isotherm (273 K – 298 K) |
| CC-DSFL         | 13.7                                                                     | 11.8                                   |
| CC-FL           | 12.3                                                                     | 10.4                                   |
| Virial          | 10.9                                                                     | 11.3                                   |

CC: Clausius-Clayperon

FL: Freundlich–Langmuir

DSFL: Dual-Site Freundlich–Langmuir

\* Adsorption branches were selected for the calculations.

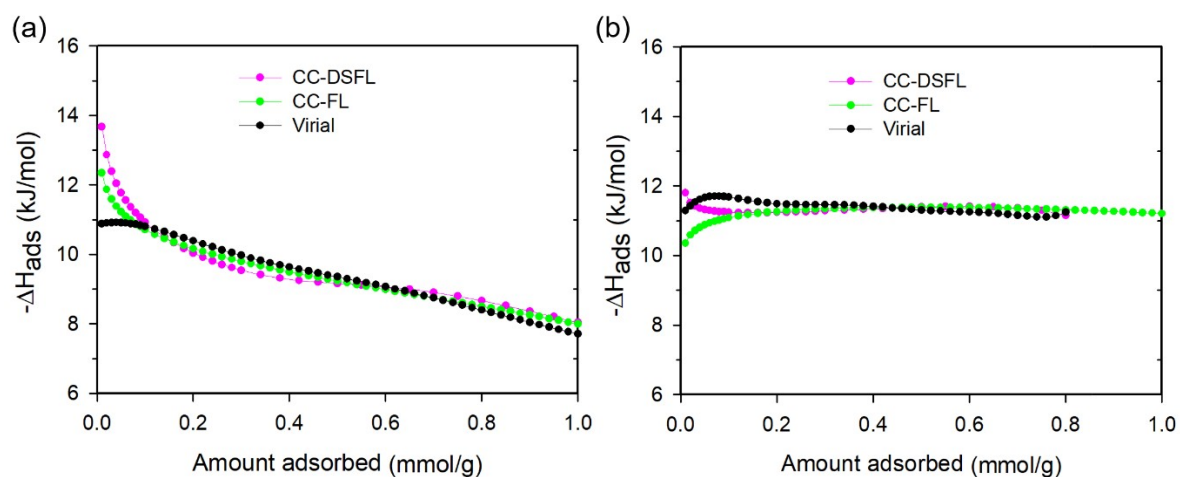

**Fig. S24.** Calculation of  $\Delta H_{ads}$  using the  $H_2$  adsorption isotherms on Cu-ZIF-gis (a) at 120K/150 K and (b) 273K/298 K, respectively.

## Section 7. N<sub>2</sub> adsorption isotherms for Cu-ZIF-**rho**

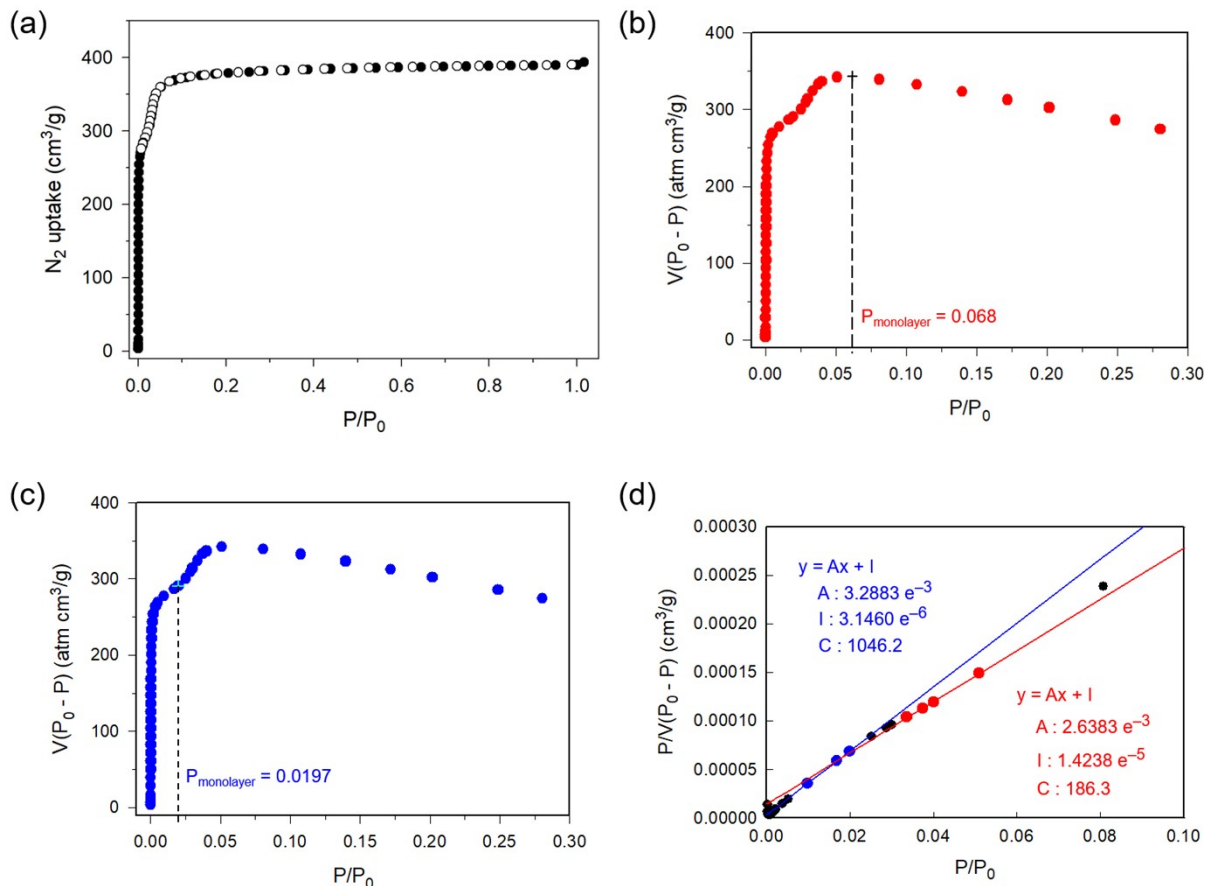

**Fig. S25.** BET analysis of Cu-ZIF-**rho** (Crystals). (a) N<sub>2</sub> gas adsorption-desorption isotherm measured at 77 K for Cu-ZIF-**rho**. The absorption branch is marked with filled circles. V(P<sub>0</sub> - P) vs. P/P<sub>0</sub> plots have monolayer gas adsorption volumes of (b) 377.0 cm<sup>3</sup>/g at P/P<sub>0</sub> = 0.068 and (c) 303.8 cm<sup>3</sup>/g at P/P<sub>0</sub> = 0.0197, respectively. (d) Plots of the linear fitting below the monolayer pressures in (b) and (c), respectively. The fitting gives the BET surface areas of 1640.9 and 1322.4 m<sup>2</sup>/g, respectively. The solvent surface of Cu-ZIF-**rho** was 3210.8 Å<sup>2</sup> per unit cell or 1400.2 m<sup>2</sup>/g based on the calculated accessible surface area using BIOVIA Materials Studio<sup>S16</sup>; the radius of a used probe was 1.84 Å, half the kinetic diameter of N<sub>2</sub>.<sup>S17</sup> Therefore, we have chosen 1322.4 m<sup>2</sup>/g as the BET surface area of Cu-ZIF-**rho** because it is closer to the calculated geometric surface area.

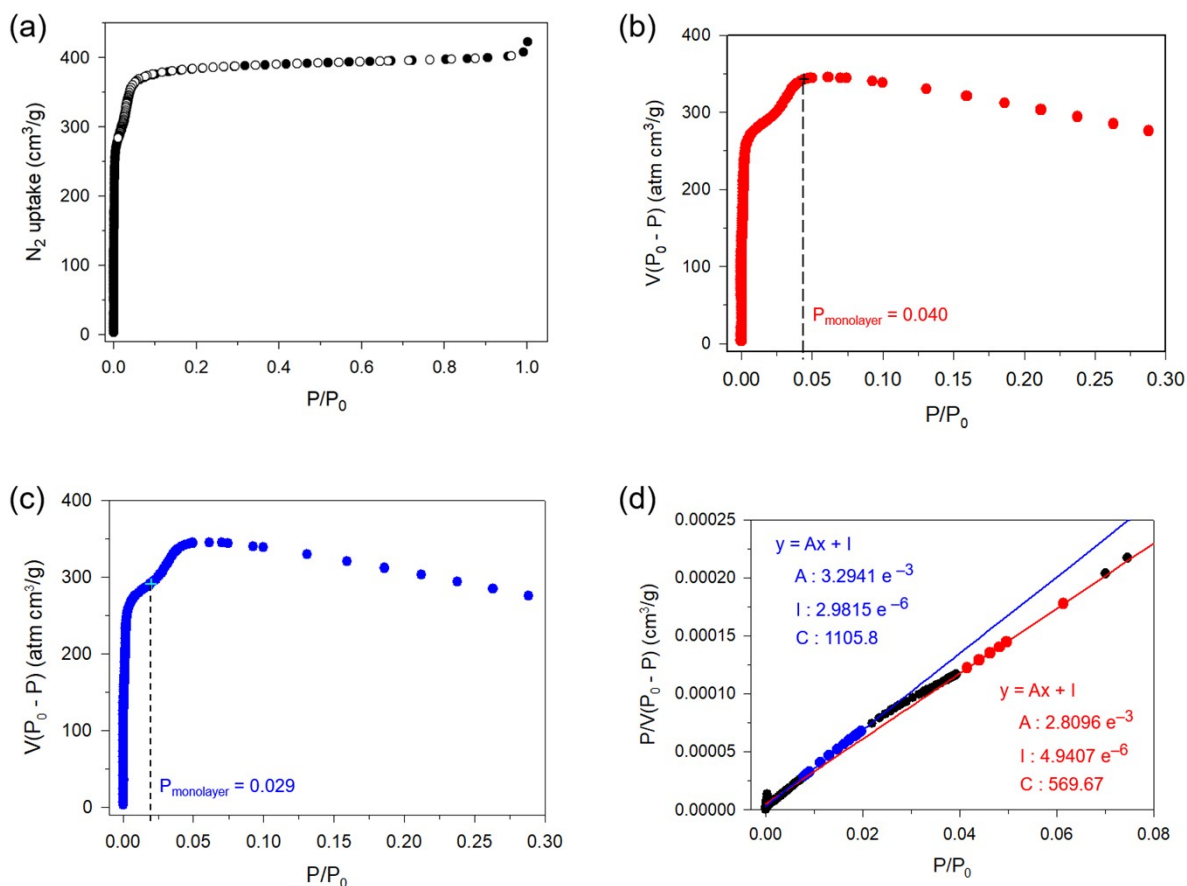

**Fig. S26.** BET analysis of Cu-ZIF-**rho** (Sub-micron crystals). (a) N<sub>2</sub> gas adsorption-desorption isotherm measured at 77 K for sub-micron crystalline Cu-ZIF-**rho**. The absorption branch is marked with filled circles. V(P<sub>0</sub> - P) vs. P/P<sub>0</sub> plots have monolayer gas adsorption volumes of (b) 353.3 cm<sup>3</sup>/g at P/P<sub>0</sub> = 0.040 and (c) 303.3 cm<sup>3</sup>/g at P/P<sub>0</sub> = 0.029, respectively. (d) Plots of the linear fitting below the monolayer pressures in (b) and (c), respectively. The fitting gives the BET surface areas of 1546.4 and 1320.1 m<sup>2</sup>/g, respectively. The solvent surface of Cu-ZIF-**rho** was 3210.8 Å<sup>2</sup> per unit cell or 1400.2 m<sup>2</sup>/g based on the calculated accessible surface area using BIOVIA Materials Studio<sup>S16</sup>; the radius of a used probe was 1.84 Å, half the kinetic diameter of N<sub>2</sub>.<sup>S17</sup> Therefore, we have chosen 1320.1 m<sup>2</sup>/g as the BET surface area of sub-micron Cu-ZIF-**rho** because it is closer to the calculated geometric surface area.

## Section 8. Gas Adsorption Measurements for Cu-ZIF-**rho**

**Table S11.** Gas adsorption enthalpy values at zero coverages and maximum uptakes of Cu-ZIF-**rho**.

| Gas             | -ΔH <sub>ads</sub> (kJ/mol)  |                                                                                    | Amount adsorbed (cm <sup>3</sup> /g, 1 bar) |             |             |
|-----------------|------------------------------|------------------------------------------------------------------------------------|---------------------------------------------|-------------|-------------|
|                 | Virial method <sup>S18</sup> | Clausius–Clapeyron eq. w/t Dual-site Langmuir-Freundlich correction <sup>S18</sup> |                                             |             |             |
| H <sub>2</sub>  | 9.0 (max. 9.3)               | 26.0 (77 K, 87 K)                                                                  | 85.9 (87K)                                  | 127.6 (77K) |             |
|                 |                              | 15.4 (253 K, 273 K)                                                                |                                             |             |             |
| CH <sub>4</sub> | 15.3                         | 14.9 (253 K, 298 K)                                                                | 16.8 (253K)                                 | 12.1 (273K) | 7.7 (298K)  |
|                 |                              | 15.2 (273 K, 273 K)                                                                |                                             |             |             |
|                 |                              | 23.7 (253 K, 273 K)                                                                |                                             |             |             |
| CO <sub>2</sub> | 20.8                         | 22.8 (253 K, 273 K)                                                                | 88.6 (253K)                                 | 48.5 (273K) | 24.4 (298K) |
|                 |                              | 22.3 (253 K, 273 K)                                                                |                                             |             |             |

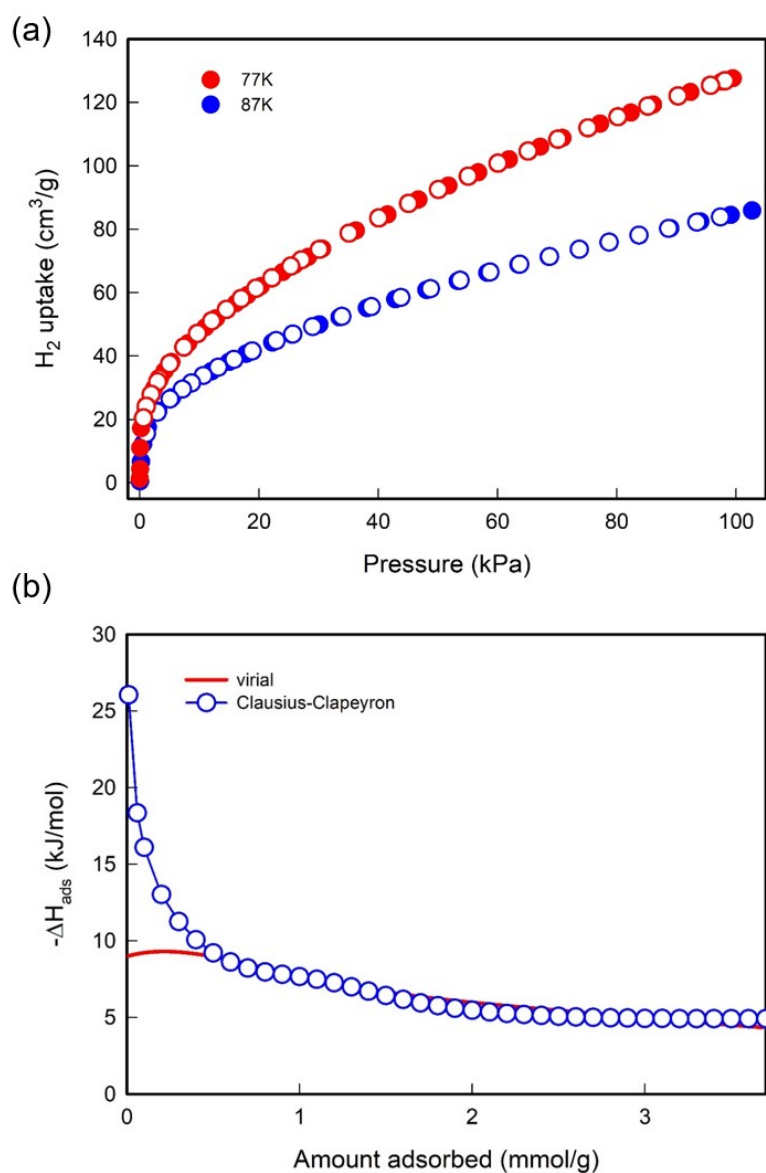

**Fig. S27.** H<sub>2</sub> adsorption on Cu-ZIF-rho. (a) H<sub>2</sub> gas adsorption-desorption isotherms measured at 77 K and 87 K, respectively. (b) Isosteric enthalpy plot of the H<sub>2</sub> adsorption from virial analysis and the DS-FL fit together with the Clausius–Clapeyron equation (DS-FL/CC) and the Virial analysis.<sup>S18</sup>

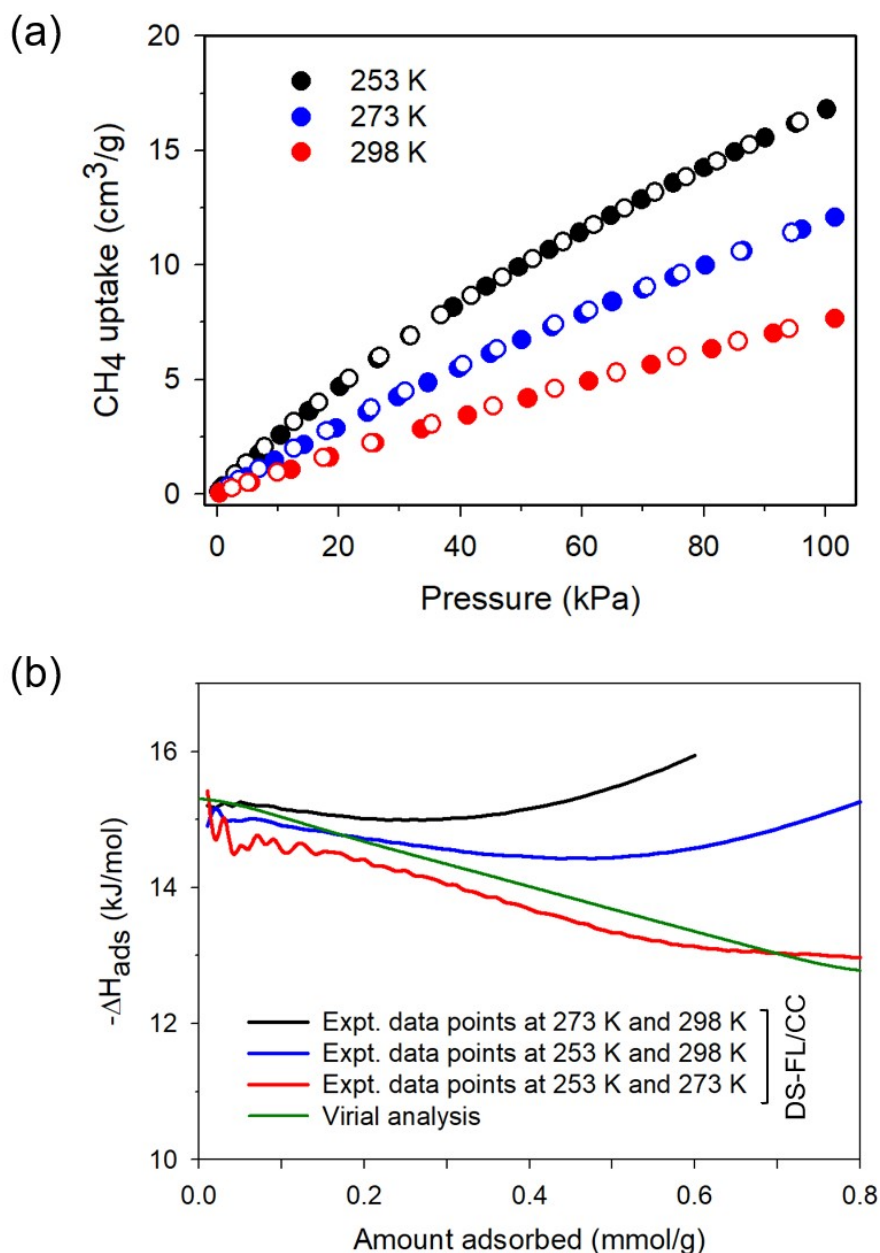

**Fig. S28.**  $\text{CH}_4$  adsorption on Cu-ZIF-rho. (a) Measured  $\text{CH}_4$  gas adsorption-desorption isotherms at three different temperatures, where the absorption branches are marked with filled circles. (b) Isosteric enthalpy plots of  $\text{CH}_4$  adsorption from a DS-FL/CC method and the Virial analysis, respectively.<sup>S18</sup>

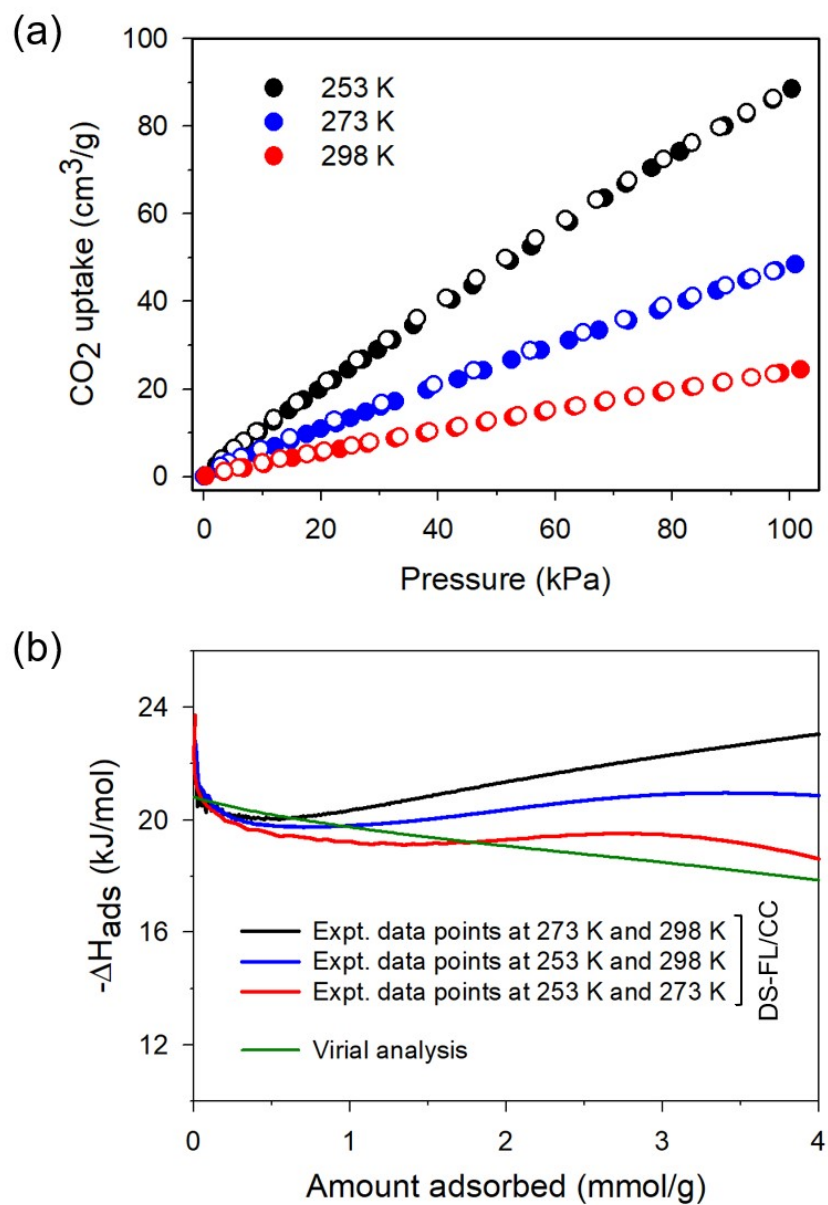

**Fig. S29.** CO<sub>2</sub> adsorption on Cu-ZIF-rho. (a) Measured CO<sub>2</sub> gas adsorption-desorption isotherms at three different temperatures, where the absorption branches are marked with filled circles. (b) Isosteric enthalpy plots of CO<sub>2</sub> adsorption from a DS-FL/CC method and the Virial analysis, respectively.<sup>S18</sup>



**Table S12.** The high-pressure gas adsorption capacity of Cu-ZIF-**rho**. The X-ray density (0.971 g/cm<sup>3</sup>) was used for the conversion between the gravimetric and volumetric capacities.

| Gas             | Gas adsorption capacity at T = 273 K |                                     |          |                      |                                     |          |       |
|-----------------|--------------------------------------|-------------------------------------|----------|----------------------|-------------------------------------|----------|-------|
|                 | Excess                               |                                     |          | Total                |                                     |          | P     |
|                 | (cm <sup>3</sup> /g)                 | (cm <sup>3</sup> /cm <sup>3</sup> ) | (mmol/g) | (cm <sup>3</sup> /g) | (cm <sup>3</sup> /cm <sup>3</sup> ) | (mmol/g) | (bar) |
| H <sub>2</sub>  | 29.7                                 | 28.8                                | 1.326    | 76.9                 | 74.7                                | 3.433    | 83    |
| CH <sub>4</sub> | 112                                  | 109                                 | 5.000    | 173                  | 168                                 | 7.723    | 83    |
| CO <sub>2</sub> | 238                                  | 231                                 | 10.625   | 264                  | 256                                 | 11.786   | 32    |
| Gas             | Gas adsorption capacity at T = 298 K |                                     |          |                      |                                     |          |       |
|                 | Excess                               |                                     |          | Total                |                                     |          | P     |
|                 | (cm <sup>3</sup> /g)                 | (cm <sup>3</sup> /cm <sup>3</sup> ) | (mmol/g) | (cm <sup>3</sup> /g) | (cm <sup>3</sup> /cm <sup>3</sup> ) | (mmol/g) | (bar) |
| H <sub>2</sub>  | 24.7                                 | 24.0                                | 1.103    | 69.2                 | 67.2                                | 3.089    | 85    |
| CH <sub>4</sub> | 99                                   | 96                                  | 4.420    | 151                  | 147                                 | 6.741    | 85    |
| CO <sub>2</sub> | 182                                  | 177                                 | 8.125    | 224                  | 218                                 | 10.000   | 51    |

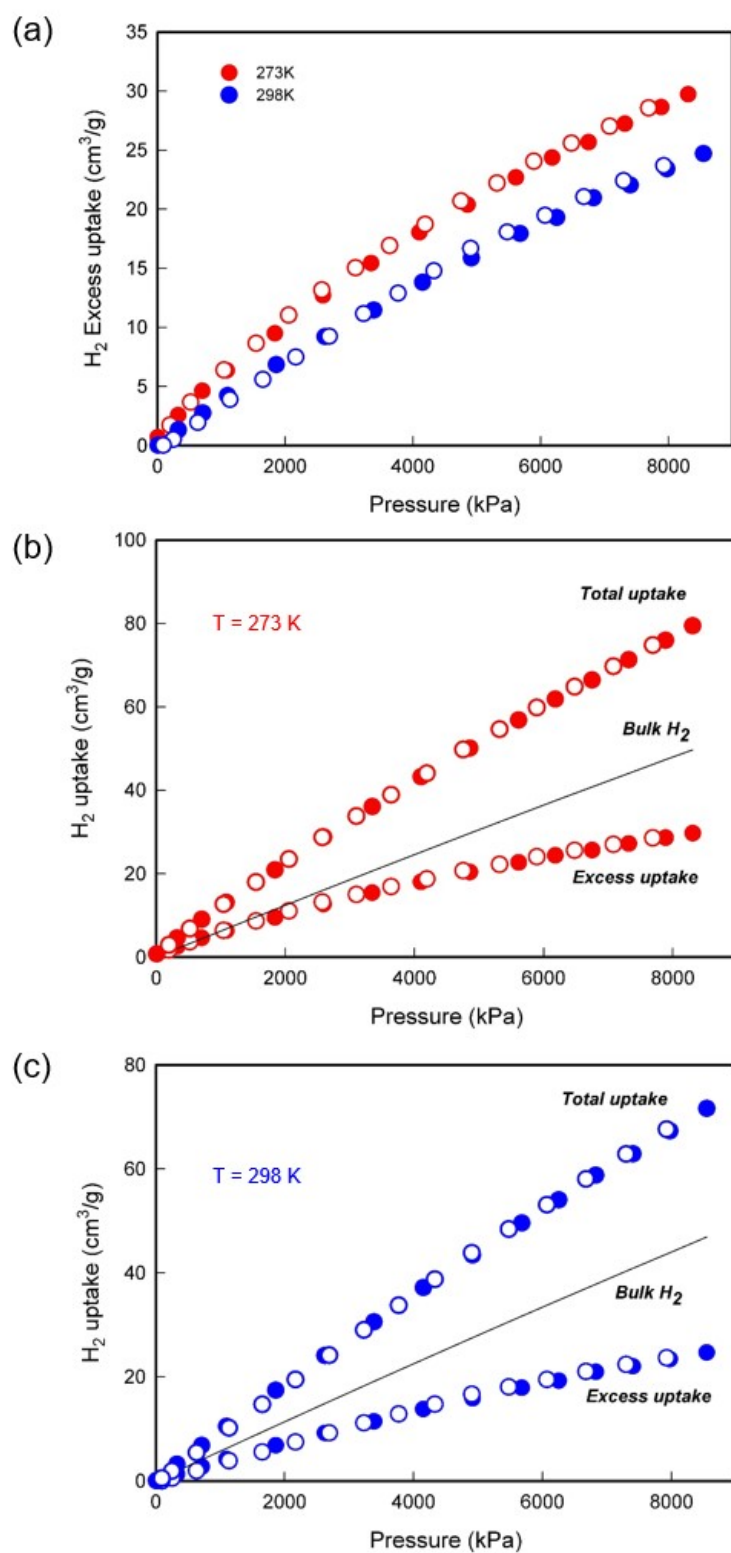

**Fig. S30.** (a) H<sub>2</sub> gas excess adsorption-desorption isotherms up to ~80 bar for Cu-ZIF-rho. The absorption branches are marked with filled circles. Total and excess H<sub>2</sub> gas adsorption-desorption data at (b) 273 K and (c) 298 K, respectively.

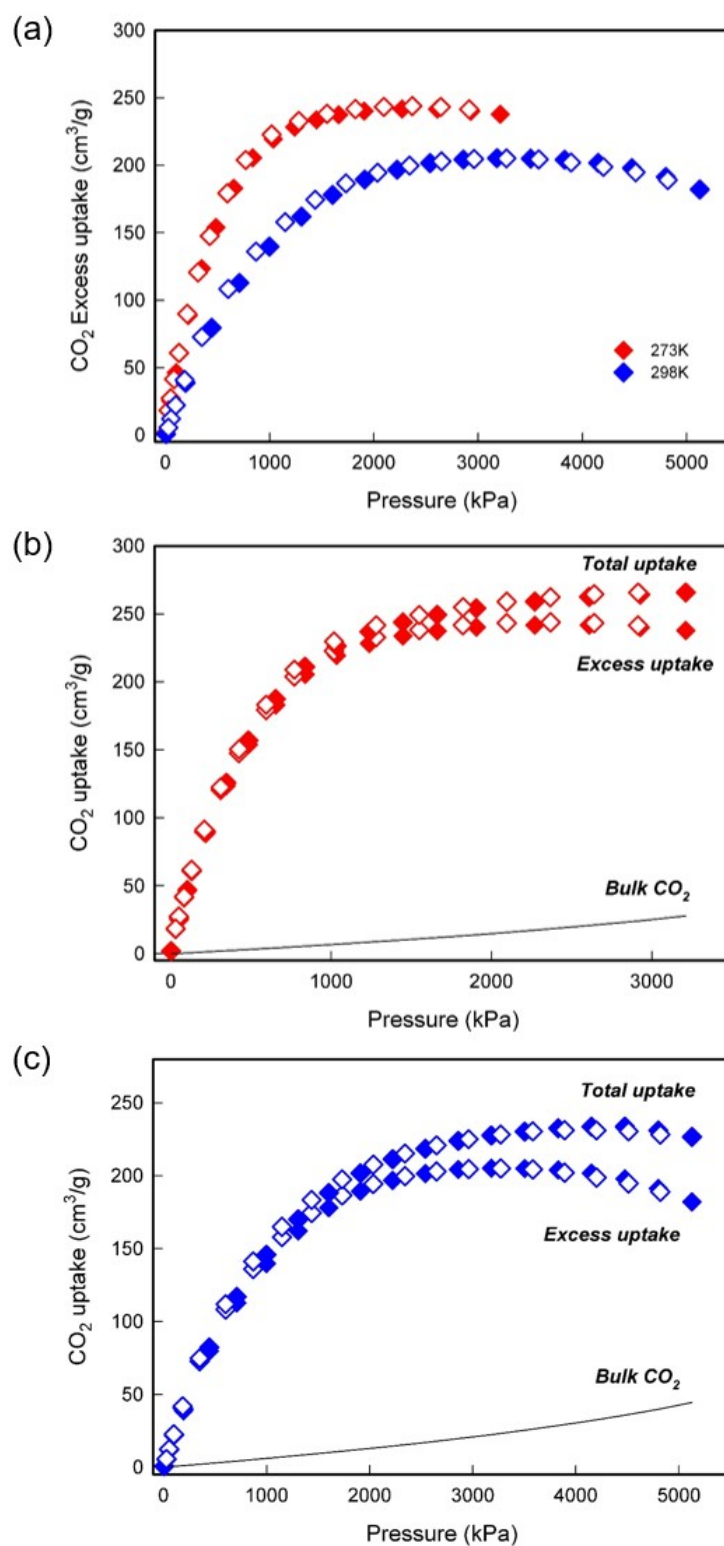

**Fig. S31.** (a) CO<sub>2</sub> gas excess adsorption-desorption isotherm measured at high pressure for Cu-ZIF-rho. The absorption branches are displayed with filled marks. Total and excess CO<sub>2</sub> gas adsorption-desorption data at (b) 273 K and (c) 298 K, respectively.

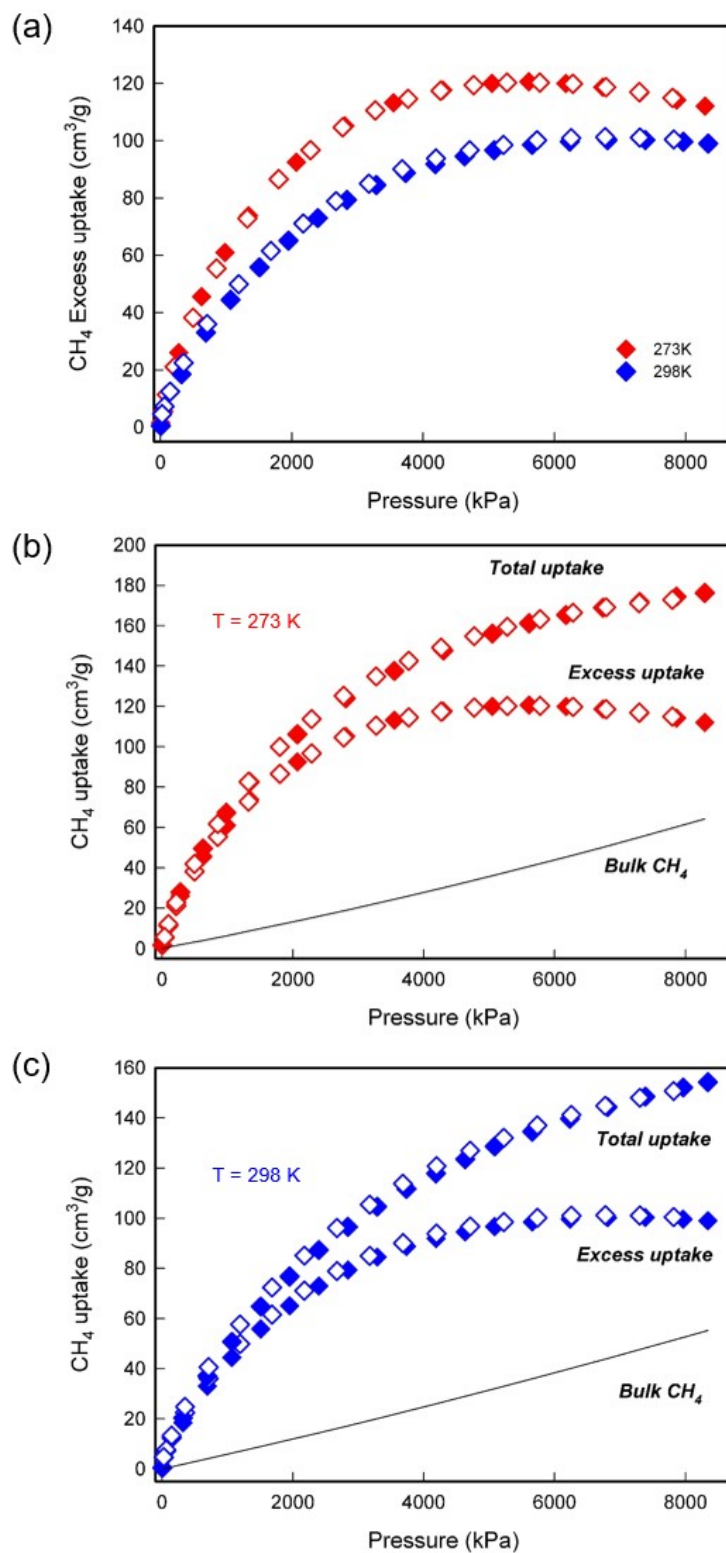

**Fig. S32.** (a) CH<sub>4</sub> gas excess adsorption-desorption isotherms up to ~80 bar for Cu-ZIF-rho. The absorption branches are marked with filled circles. Total and excess CH<sub>4</sub> gas adsorption-desorption data at (b) 273 K and (c) 298 K, respectively.

## References

- S1. Arvai, A. J.; Nielsen, C. ADSC Quantum-210 ADX Program, Area Detector System Corporation; Poway, CA, USA, **1983**.
- S2. Otwinowski, Z.; Minor, W.; in *Methods in Enzymology*, ed. Carter, Jr., C. W.; Sweet, R. M. Academic Press, New York, 1997, vol. 276, part A, pp. 307.
- S3. Sheldrick, G. M. A short history of SHELX. *Acta Cryst.* **2008**, *A64*, 112.
- S4. Spek, A. L. *Acta Cryst.* **2009**, *D65*, 148.
- S5. Sheldrick, G. M. *Acta Cryst.* **2015**, *C71*, 3.
- S6] Masciocchi, N.; Bruni, S.; Cariati, E.; Cariati, F.; Galli, S.; Sironi, A. *Inorg. Chem.* **2001**, *40*, 5897–5905.
- S7. Tian, Y.-Q.; Yao, S.-Y.; Gu, D.; Cui, K.-H.; Guo, D.-W.; Zhang, G.; Chen, Z.-X.; Zhao, D.-Y. *Chem. Eur. J.* **2010**, *16*, 1137–1141.
- S8. Biswal, B. P.; Panda, T.; Banerjee, R. *Chem. Commun.* **2012**, *48*, 11868–11870.
- S9. Banerjee, R.; Phan, A.; Wang, B.; Knobler, C.; Furukawa, H.; O’Keeffe, M.; Yaghi, O. M. *Science* **2008**, *319*, 939–943.
- S10. Yang, J.; Zhang, Y.; Liu, Q.; Trickett, C. A.; Gutierrez-Puebla, E.; Monge, M. Á.; Cong, H.; Aldossary, A.; Deng, H.; Yaghi, O. M. *J. Am. Chem. Soc.* **2017**, *139*, 6448–6455.
- S11. Nguyen, N. T. T.; Furukawa, H.; Gándara, F.; Nguyen, H. T.; Cordova, K. E.; Yaghi, O. M. *Angew. Chem. Int. Ed.* **2014**, *53*, 10645–10648.
- S12. Park, K. S.; Ni, Z.; Côté, A. P.; Choi, J. Y.; Huang, R.; Uribe-Romo, F. J.; Chae, H. K.; O’Keeffe, M.; Yaghi, O. M. *Proc. Natl. Acad. Sci. U.S.A.* **2006**, *103*, 10186–10191.
- S13. Hayashi, H.; Côté, A. P.; Furukawa, H.; O’Keeffe, M.; Yaghi, O. M. *Nat. Mater.* **2007**, *6*, 501–506.
- S14. Oh, H.; Savchenko, I.; Mavrandonakis, A.; Heine, T.; Hirscher, M. *ACS Nano* **2014**, *8*, 761–770.
- S15. Falconer, J. L.; Madix, R. J. *Surf. Sci.* **1975**, *48*, 393–405.
- S16. BIOVIA, Dassault Systèmes, Materials Studio, 22.1.0.3462, San Diego: Dassault Systèmes, 2022.
- S17. Düren, T.; Millange, F.; Férey, G.; Walton, K. S.; Snurr, R. Q. *J. Phys. Chem. C* **2007**, *111*, 15350–15356.
- S18. Nuhnen, A.; Janiak, C. *Dalton Trans.* **2020**, *49*, 10295–10307.
